# Supplementary material for: Identification of the Metabolites of Both Formononetin in Rat Hepatic S9 and Ononin in Rat Urine Samples and Preliminary Network Pharmacology Evaluation of Their Main Metabolites
Source: MDPI journal article supplement (doi:10.3390/molecules28217451), 2023-11-06
Supplement: s1 [file s1]

# Identification of the Metabolites of Both Formononetin in Rat Hepatic S9 and Ononin in Rat Urine Samples and Preliminary Network Pharmacology Evaluation of Their Main Metabolites

Yu-Zhu Yang <sup>1,3,†</sup>, Tao Wang <sup>2,†</sup>, Qi-Lei Chen <sup>3</sup>, Hu-Biao Chen <sup>3</sup>, Qian-Song He <sup>4,\*</sup> and Ya-Zhou Zhang <sup>1,3,\*</sup>

<sup>1</sup> College of Pharmacy, Guizhou University of Traditional Chinese Medicine, Guiyang 550025, China

<sup>2</sup> Departments of, Medicine and Biomedical Engineering, Faculty of Medicine and Health Sciences, McGill University, Montreal, QC H3G1Y6, Canada

<sup>3</sup> School of Chinese Medicine, Hong Kong Baptist University, Hong Kong SAR 999077, China

<sup>4</sup> First Clinical Medical College, Guizhou University of Traditional Chinese Medicine, Guiyang 550001, China

\* Correspondence: heqiansong374@gzy.edu.cn (Q.-S.H.); zhangyazhou032@gzy.edu.cn (Y.-Z.Z.); Tel./Fax: +86-0851-8563-7296 (Q.-S.H.); Tel./Fax: +86-0851-8280-0211 (Y.-Z.Z.)

† These authors contributed equally to this work.

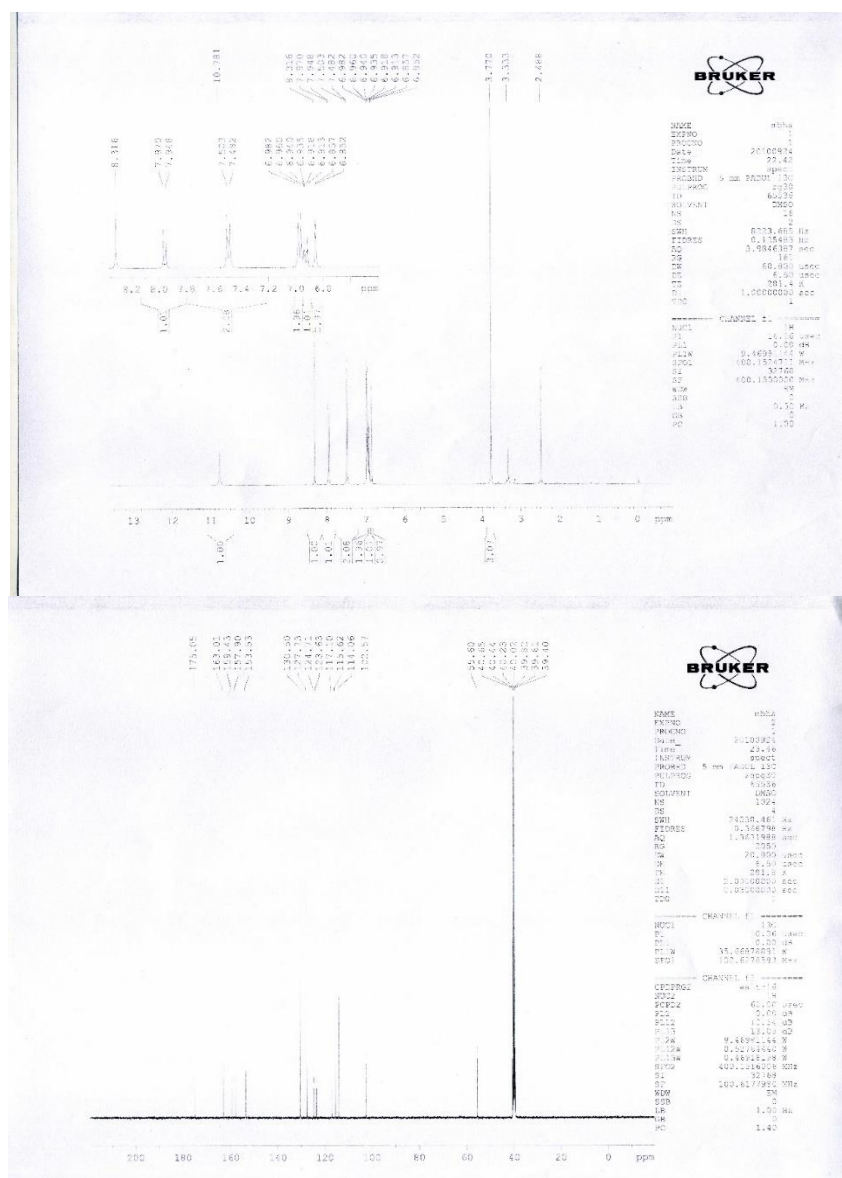

Figure S1. <sup>1</sup>H and <sup>13</sup>C NMR spectrum of Formononetin.

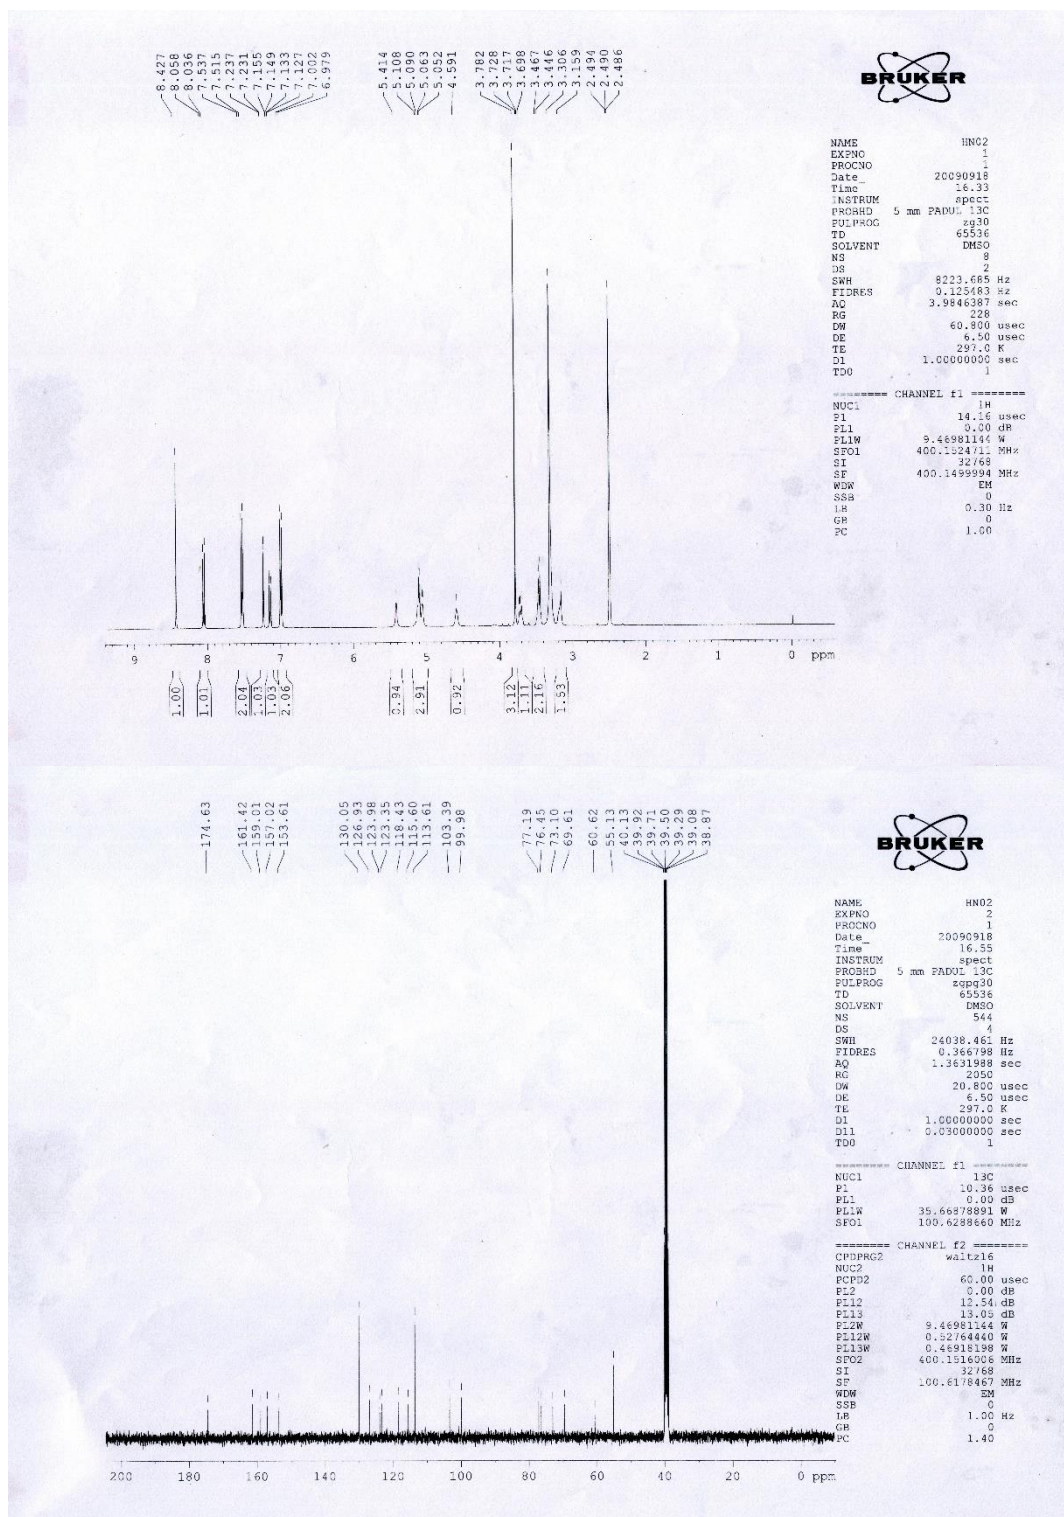

Figure S2. <sup>1</sup>H and <sup>13</sup>C NMR spectrum of Ononin.



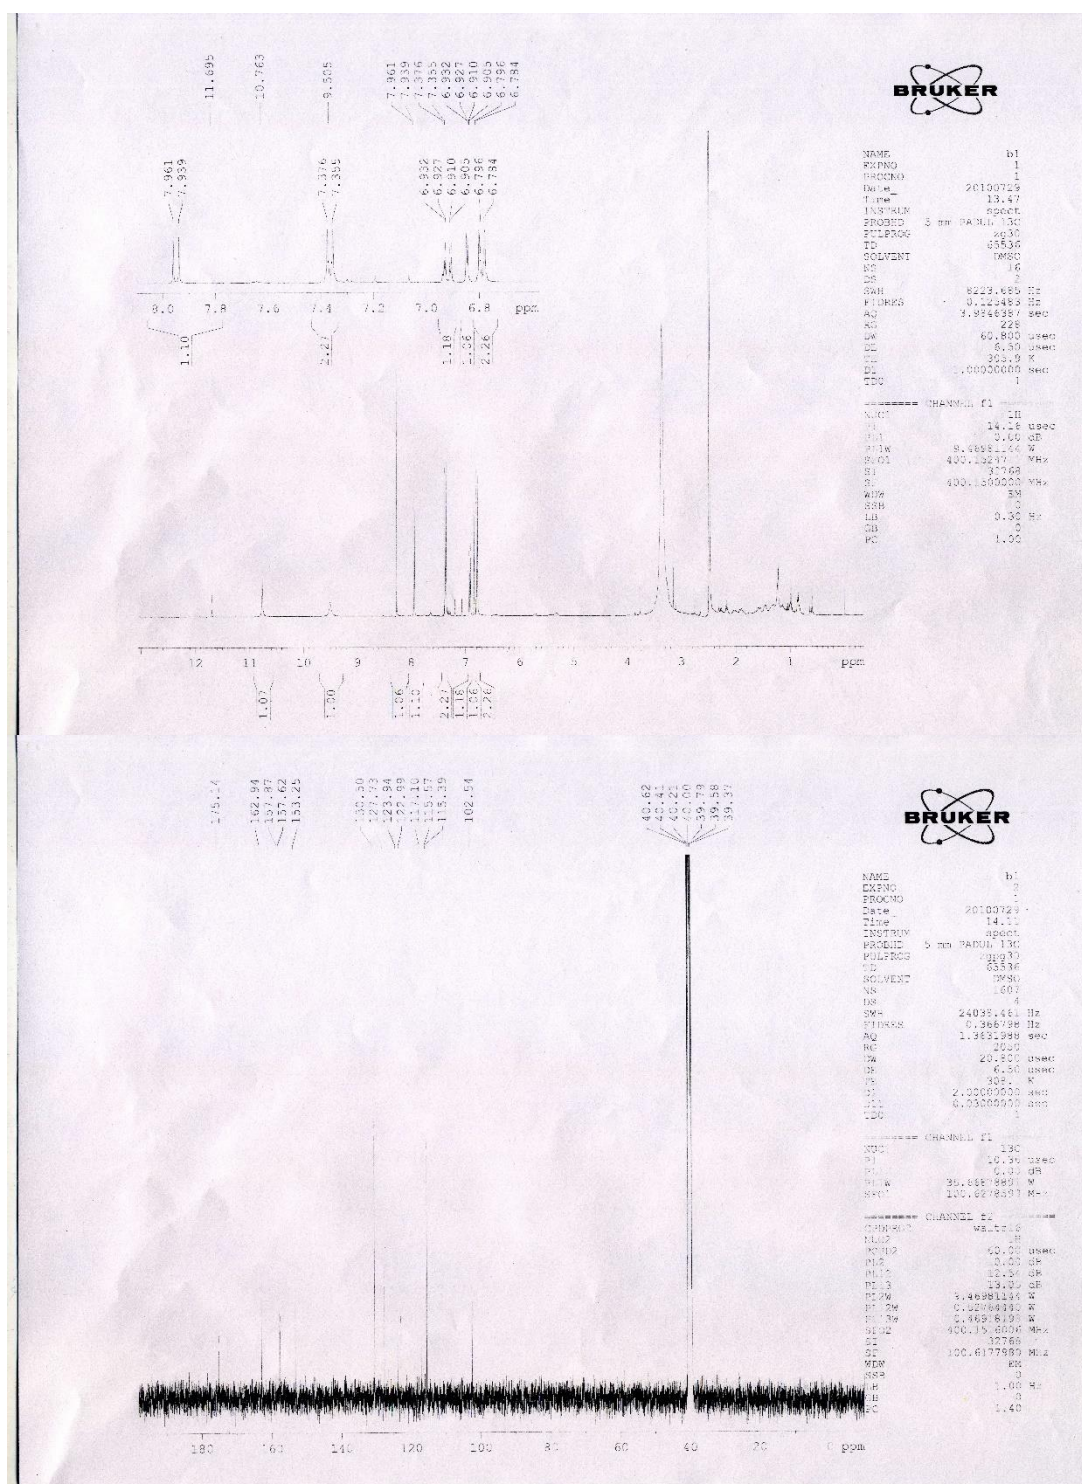

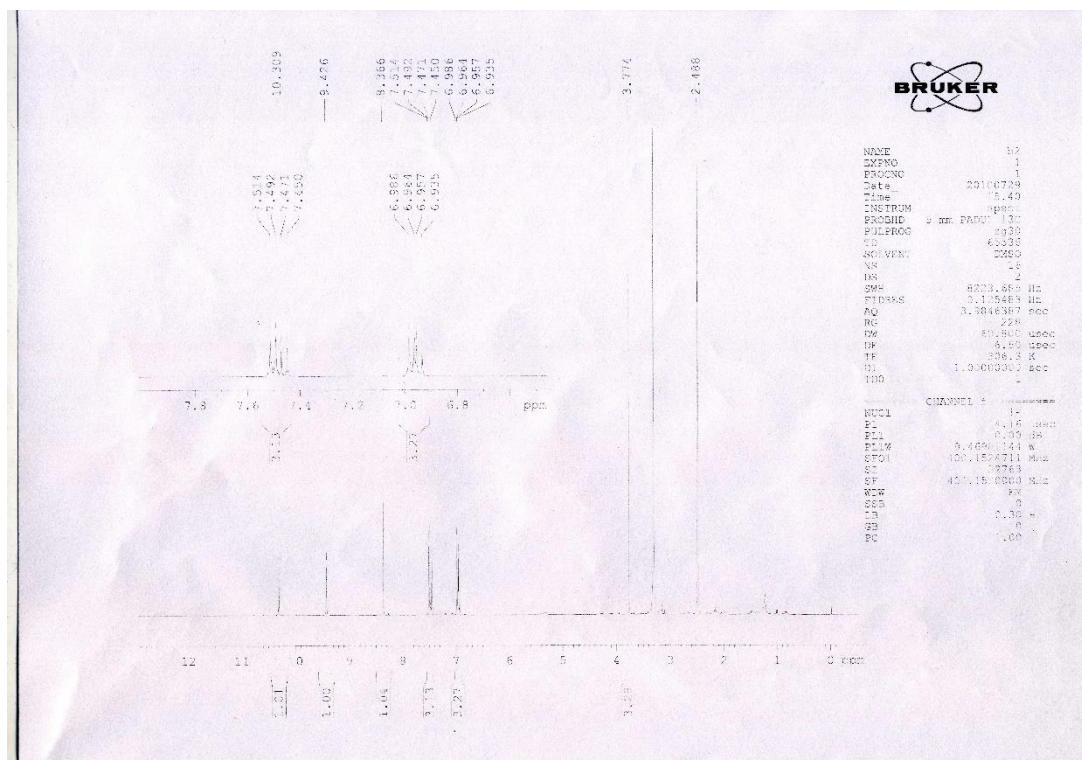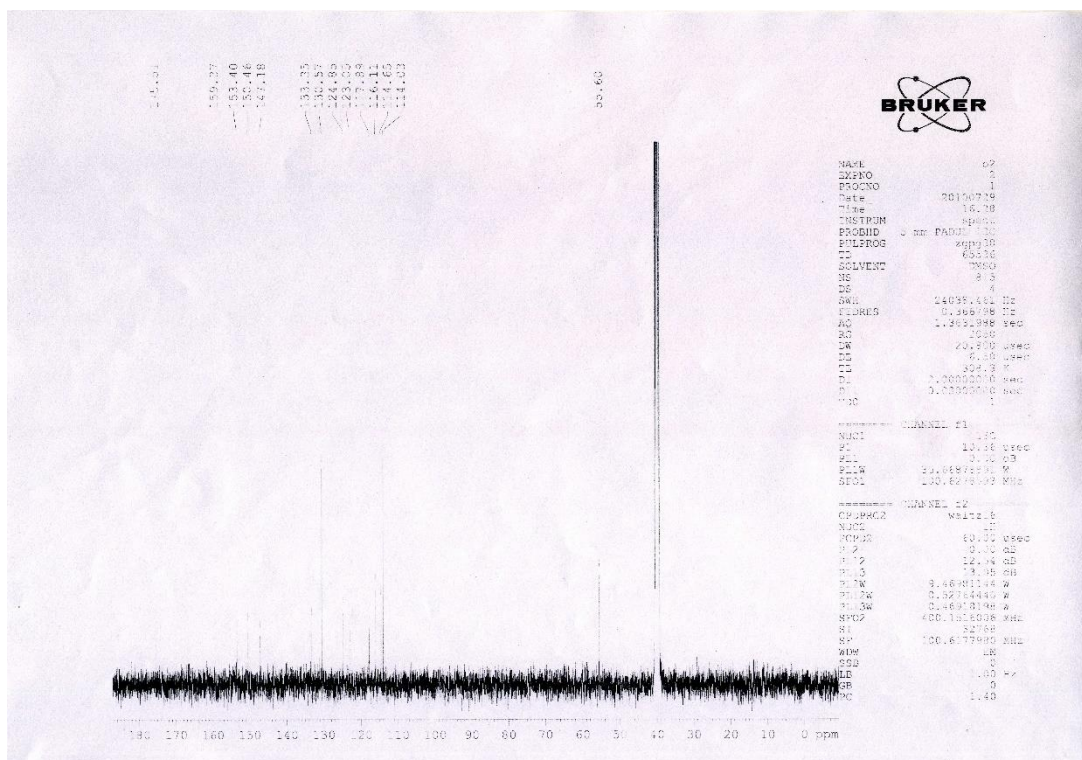

Figure S4. <sup>1</sup>H and <sup>13</sup>C NMR spectrum of Sm7.



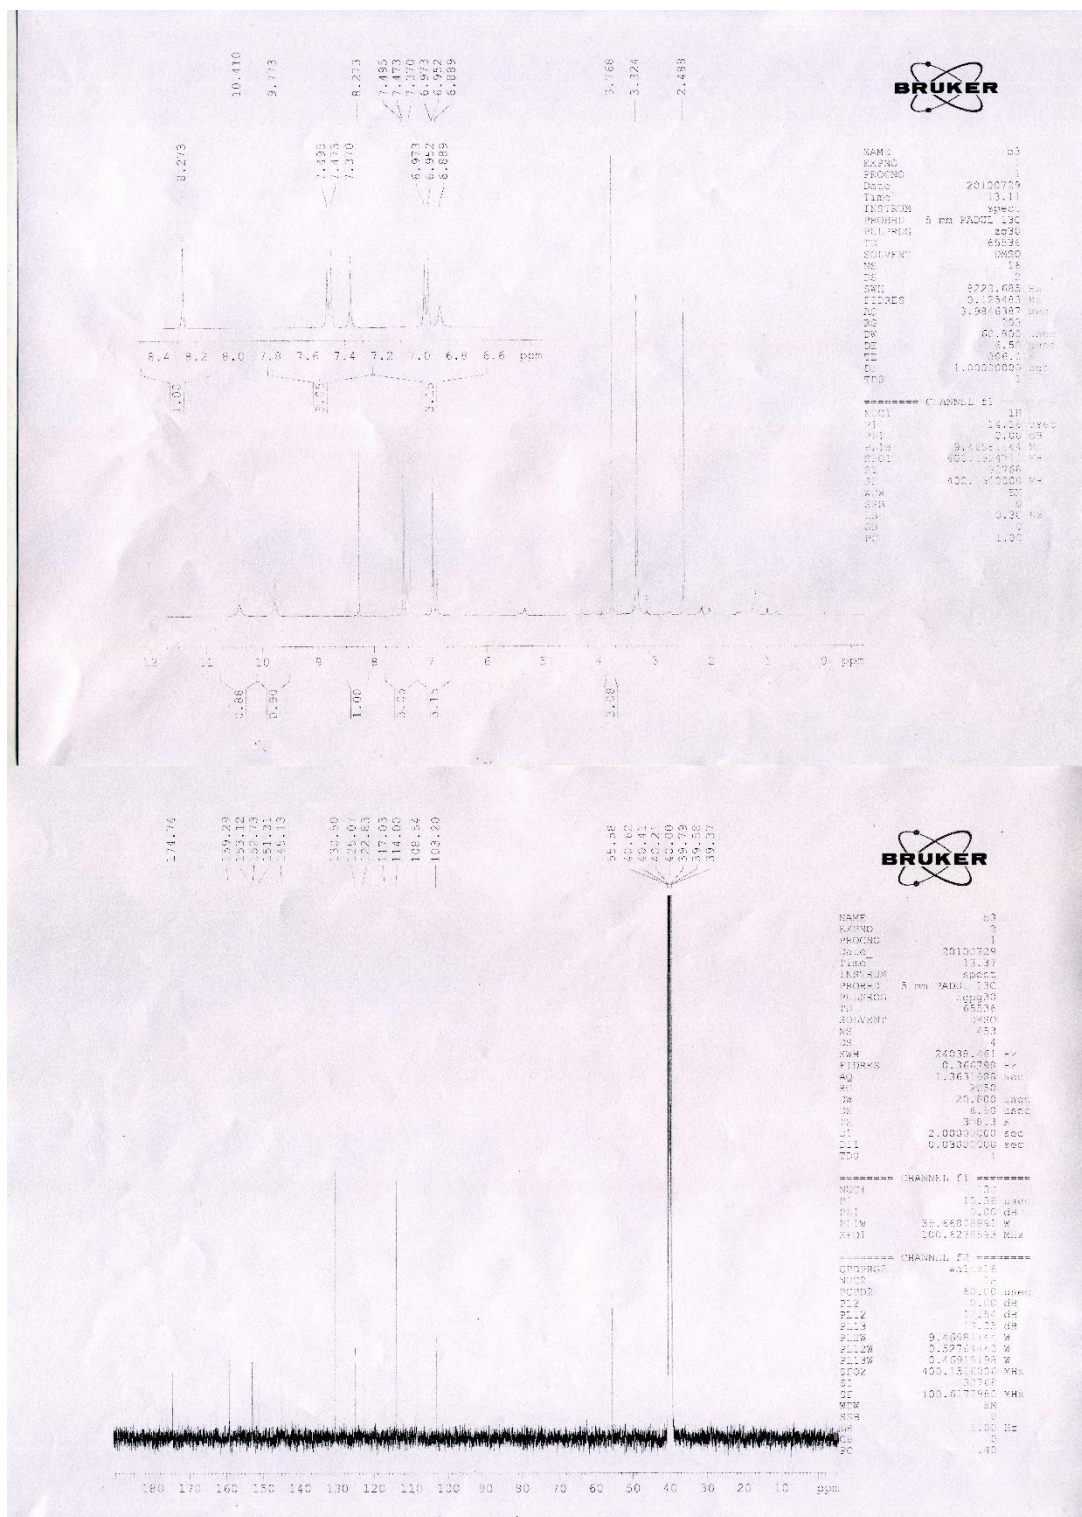

Figure S5. <sup>1</sup>H and <sup>13</sup>C NMR spectrum of Sm9.

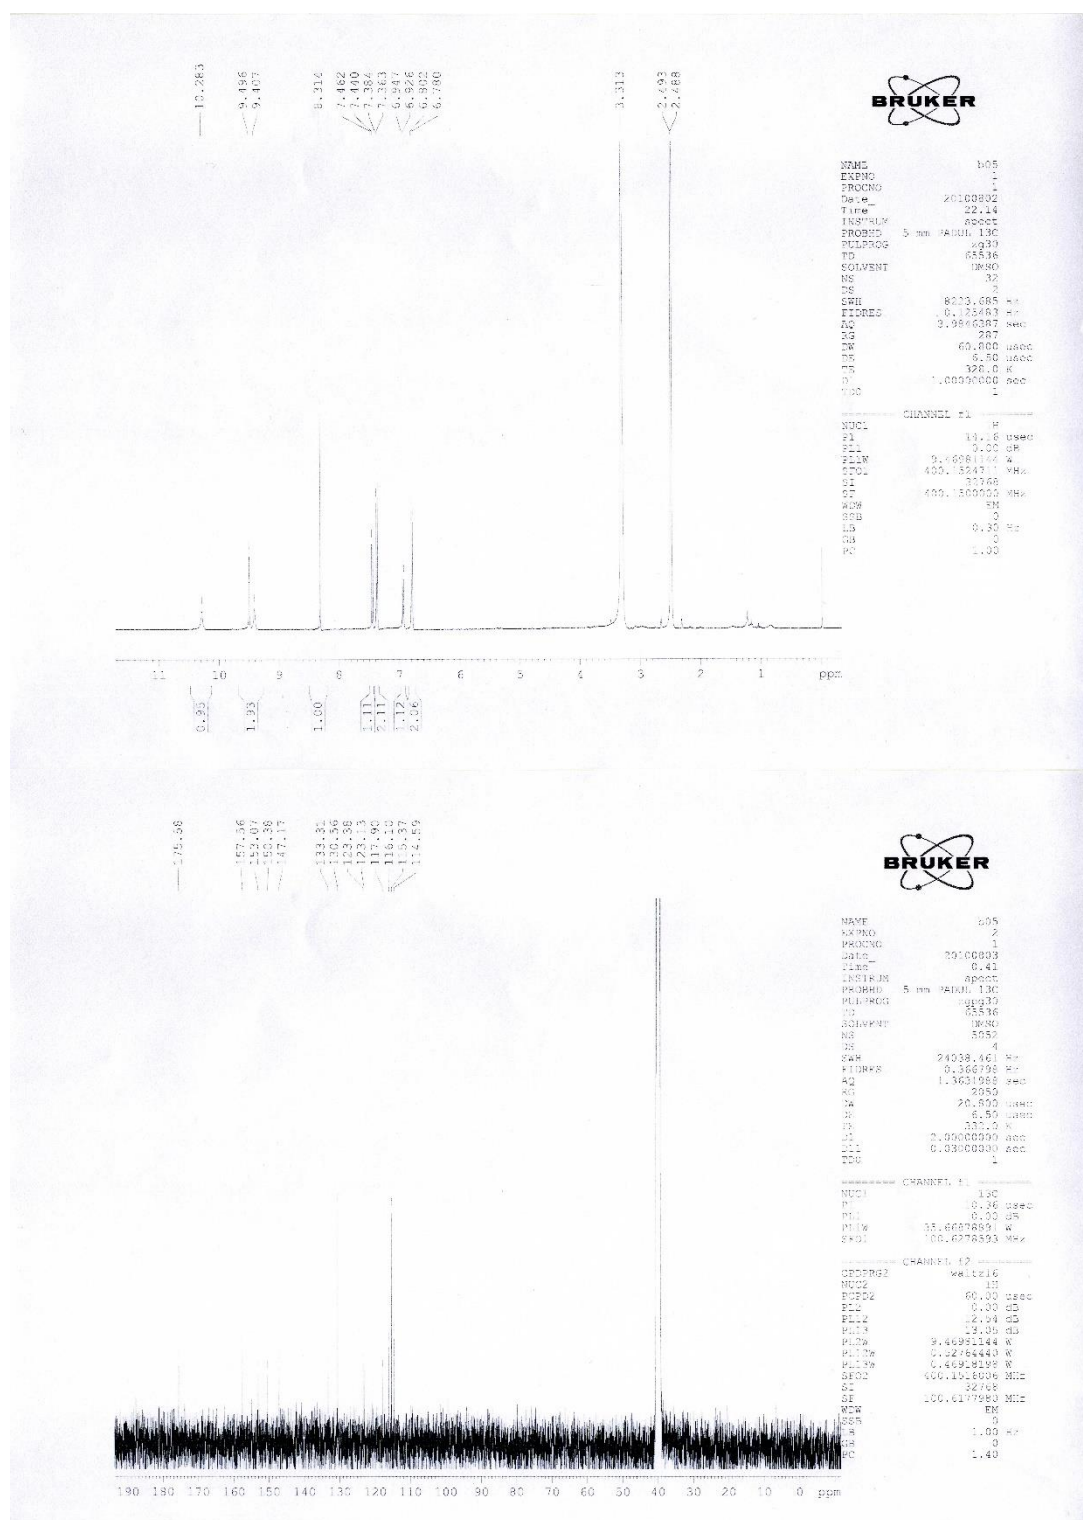

Figure S6. <sup>1</sup>H and <sup>13</sup>C NMR spectrum of Sm10.

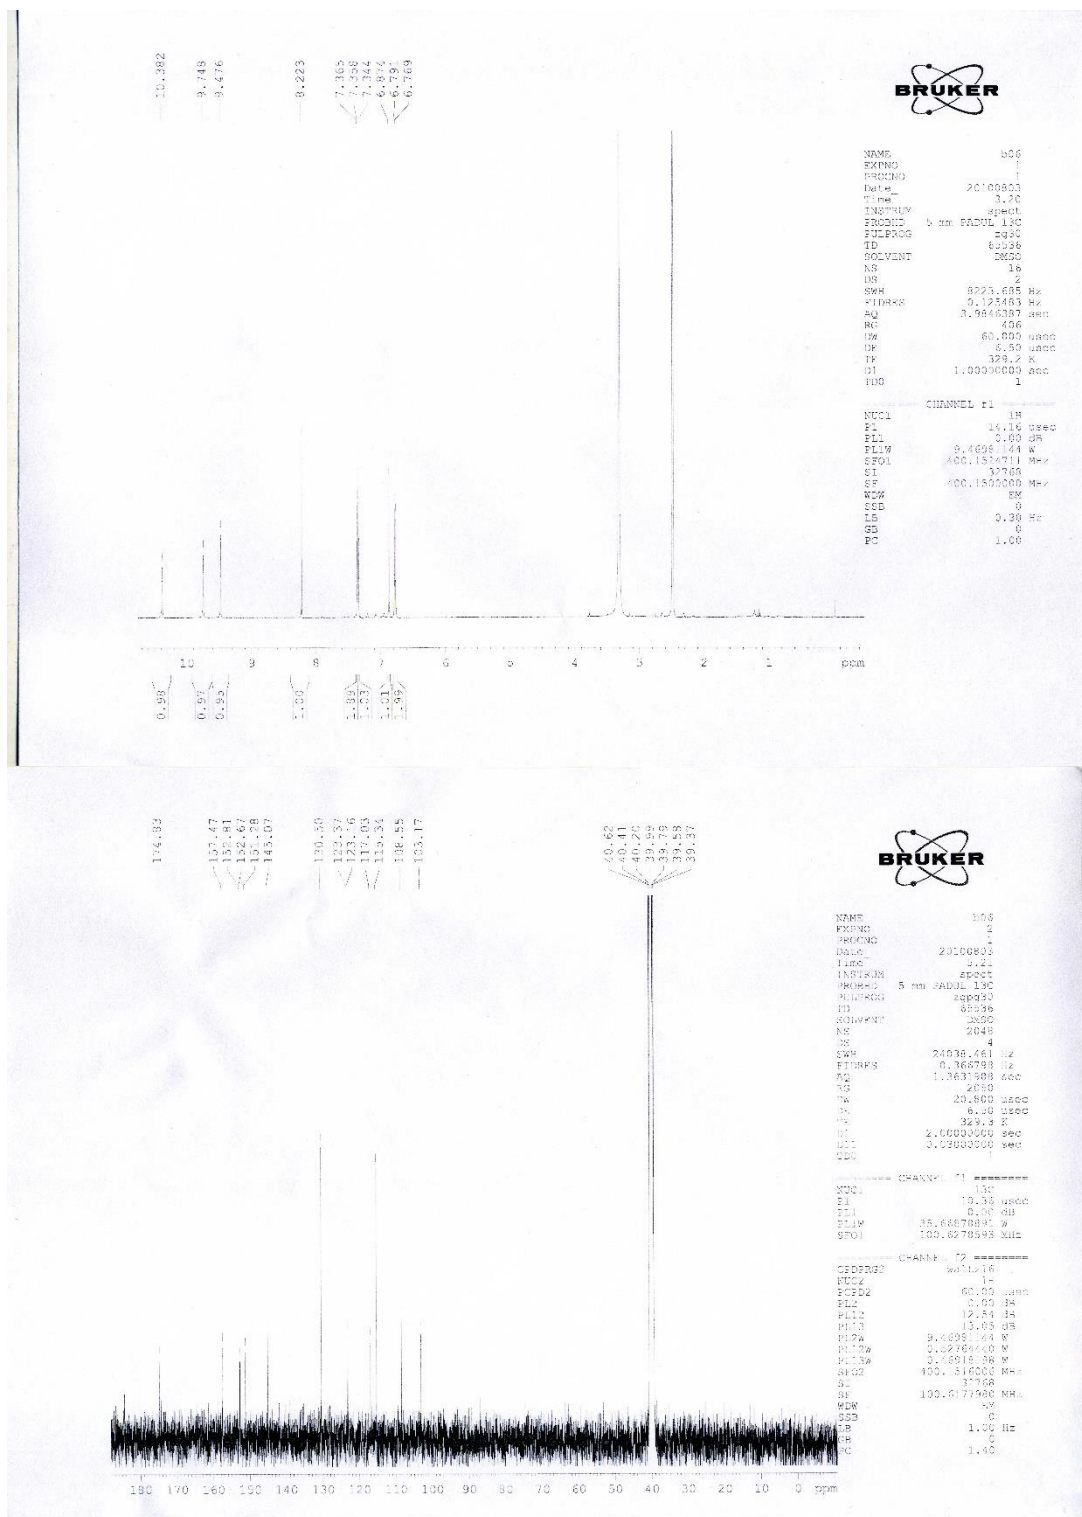

Figure S7. <sup>1</sup>H and <sup>13</sup>C NMR spectrum of Sm12.



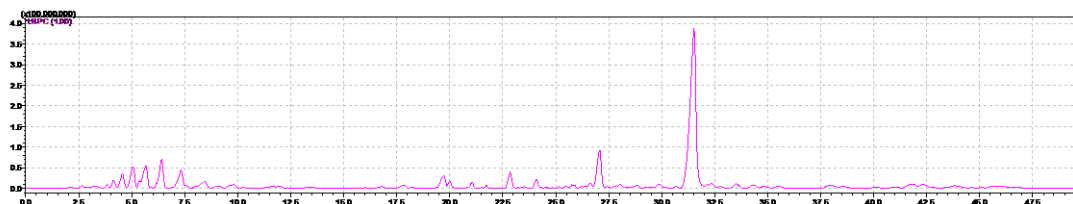

Figure S8. Formononetin with rats hepatic S9 samples by LC/MS analysis PI BPC.

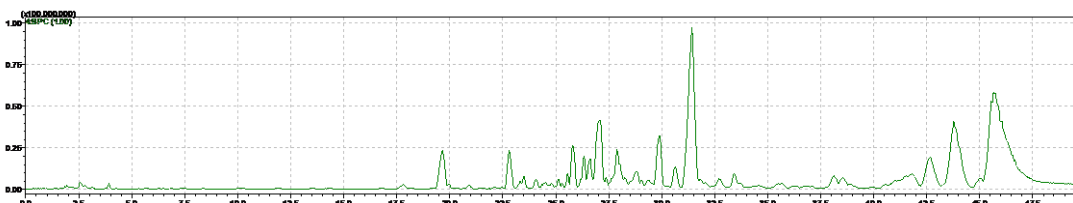

Figure S9. Formononetin with rats hepatic S9 samples by LC/MS analysis NI BPC.

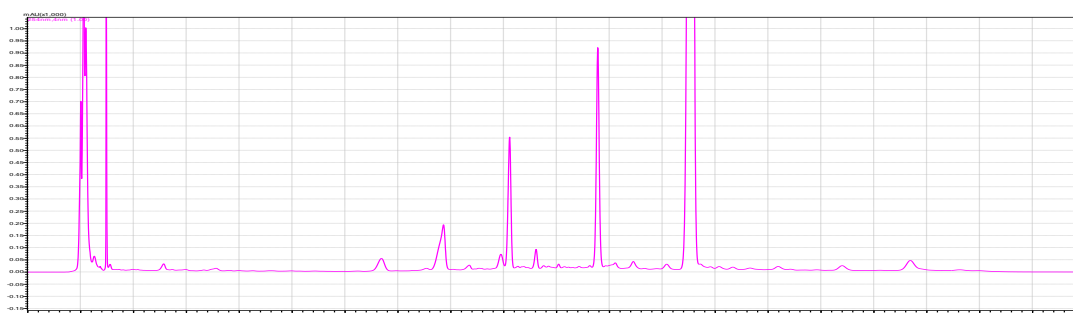

Figure S10. Formononetin with rats hepatic S9 samples UV(254nm).

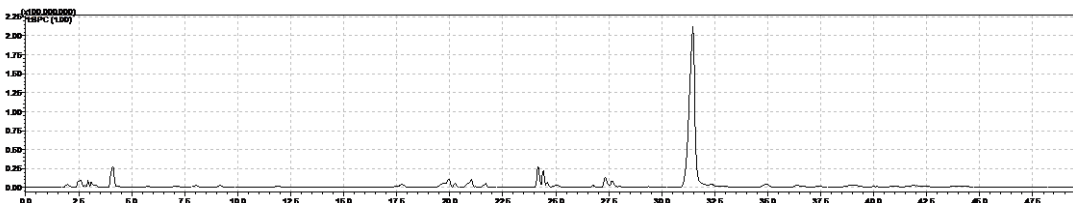

Figure S11. Formononetin without rats hepatic S9 samples PI BPC.

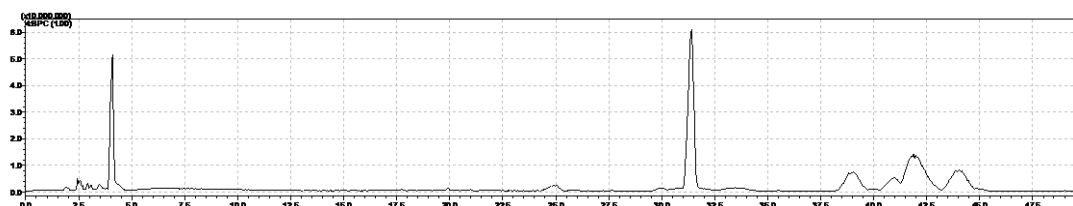

Figure S12. Formononetin without rats hepatic S9 samples NI BPC.

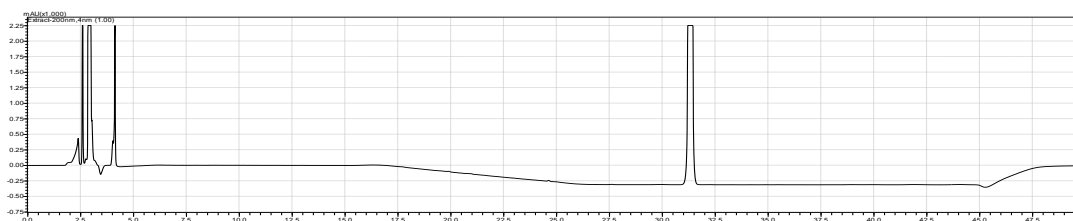

Figure S13. Formononetin without rats hepatic S9 samples UV(254nm).



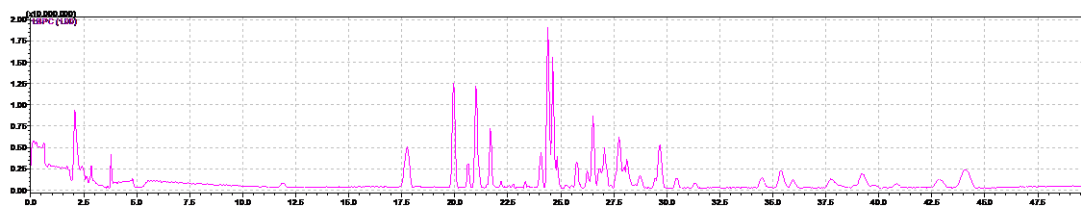

Figure S14. Hepatic S9 Sample PI BPC.

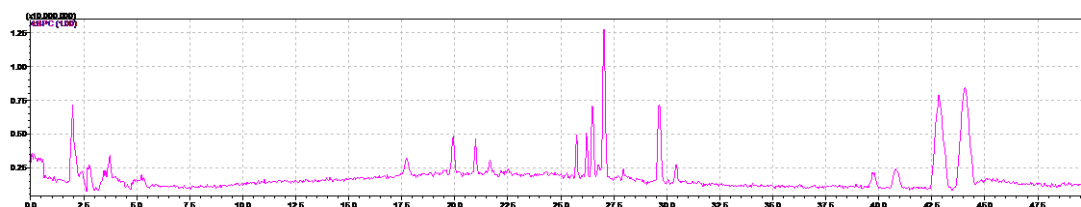

Figure S15. Hepatic S9 Sample NI BPC.

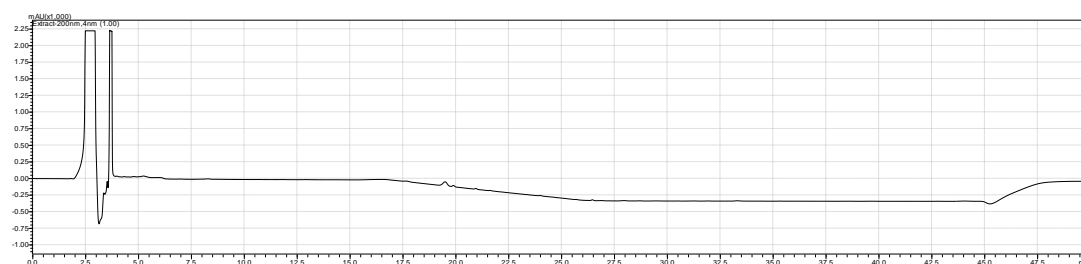

Figure S16. Hepatic S9 Sample UV(254nm).

Sm0 Formononetin

Event#: 1 MS(E+) Ret. Time : 31.205 Scan# : 3619

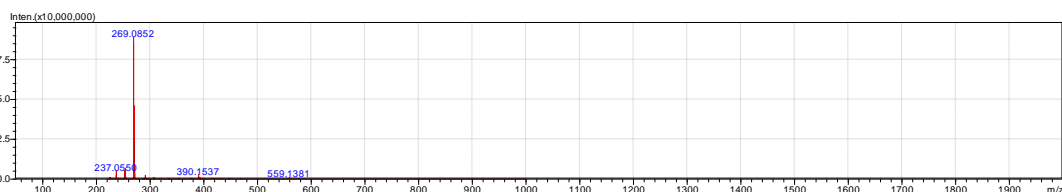

Event#: 4 MS(E-) Ret. Time : 31.205 Scan# : 3622

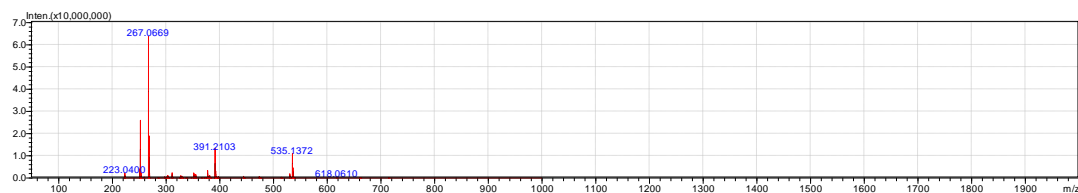

| Rank | Score | Formula (M) | Ion    | Meas. m/z | Pred. m/z | Diff (mDa) | Diff (ppm) | Iso   | Score | DBE |
|------|-------|-------------|--------|-----------|-----------|------------|------------|-------|-------|-----|
| 1    | 55.01 | C16 H12 O4  | [M-H]- | 267.0669  | 267.0657  | 1.2        | 4.49       | 60.27 | 11.0  |     |

Sm1(metabolites)

Event#: 1 MS(E+) Ret. Time : 18.568 Scan# : 2153

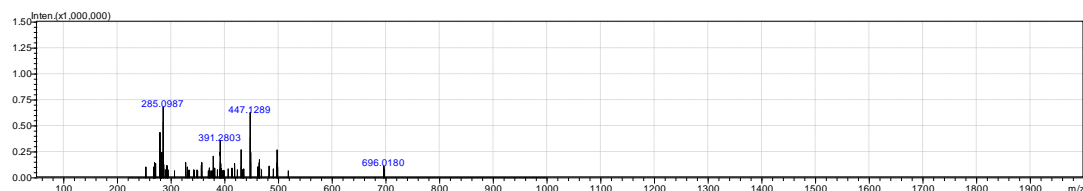

Event#: 4 MS(E-) Ret. Time : 18.568 Scan# : 2156

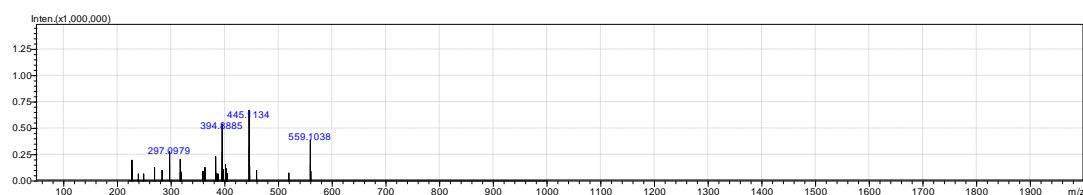

| Rank | Score | Formula (M)Ion     | Meas. m/z | Pred. m/z | Diff (mDa) | Diff (ppm) | Iso Score | DBE  |
|------|-------|--------------------|-----------|-----------|------------|------------|-----------|------|
| 1    | 57.13 | C22 H22 O10 [M+H]+ | 447.1289  | 447.1291  | -0.2       | -0.45      | 57.13     | 12.0 |

Sm2

Event#: 1 MS(E+) Ret. Time : 19.663 Scan# : 2280

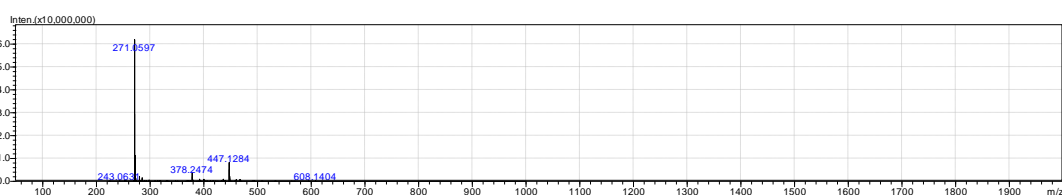

Event#: 4 MS(E-) Ret. Time : 19.663 Scan# : 2283

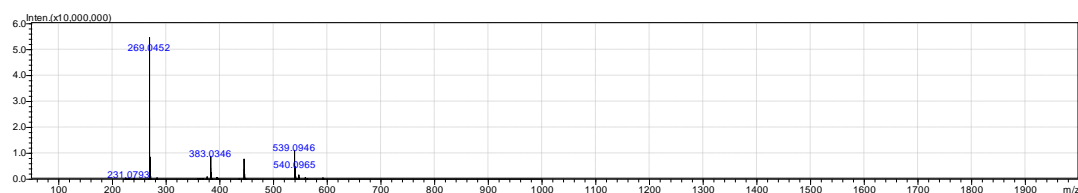

| Rank | Score | Formula (M)Ion    | Meas. m/z | Pred. m/z | Diff (mDa) | Diff (ppm) | Iso Score | DBE  |
|------|-------|-------------------|-----------|-----------|------------|------------|-----------|------|
| 1    | 59.61 | C15 H10 O5 [M+H]+ | 271.0597  | 271.0606  | -0.9       | -3.32      | 63.28     | 11.0 |

Sm3

Event#: 4 MS(E-) Ret. Time : 20.413 Scan# : 2370

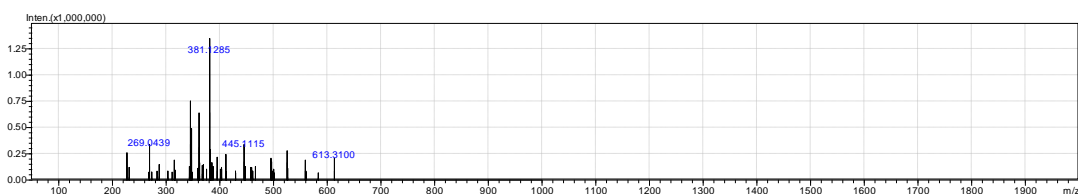

| Rank | Score | Formula (M)Ion      | Meas. m/z | Pred. m/z | Diff (mDa) | Diff (ppm) | Iso Score | DBE  |
|------|-------|---------------------|-----------|-----------|------------|------------|-----------|------|
| 1    | 24.39 | C26 H22 O5 S [M-H]- | 445.1115  | 445.1110  | 0.5        | 1.12       | 24.46     | 16.0 |
| 2    | 13.61 | C22 H22 O10 [M-H]-  | 445.1115  | 445.1135  | -2.0       | -4.49      | 14.92     | 12.0 |

Sm4

Event#: 1 MS(E+) Ret. Time : 20.897 Scan# : 2423

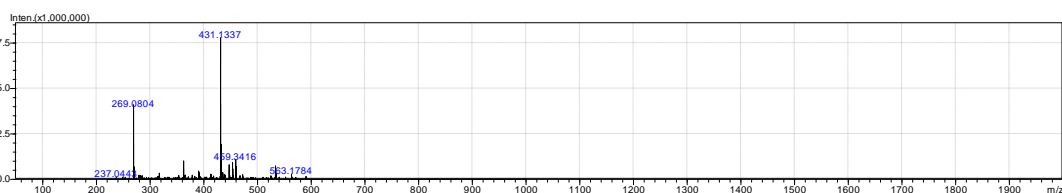

Event#: 4 MS(E-) Ret. Time : 20.897 Scan# : 2426

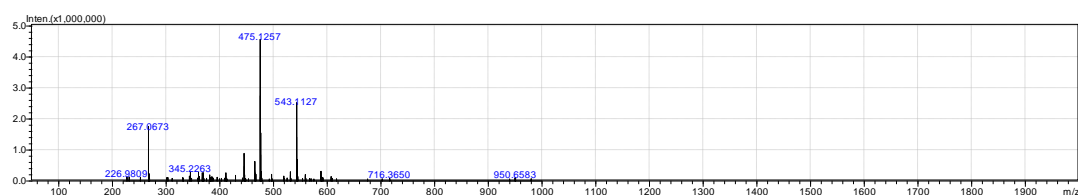

| Rank | Score | Formula (M)Ion    | Meas. m/z | Pred. m/z | Diff (mDa) | Diff (ppm) | Iso Score | DBE  |
|------|-------|-------------------|-----------|-----------|------------|------------|-----------|------|
| 1    | 96.59 | C22 H22 O9 [M+H]+ | 431.1337  | 431.1342  | -0.5       | -1.16      | 96.98     | 12.0 |

Sm5

Event#: 1 MS(E+) Ret. Time : 21.483 Scan# : 2491

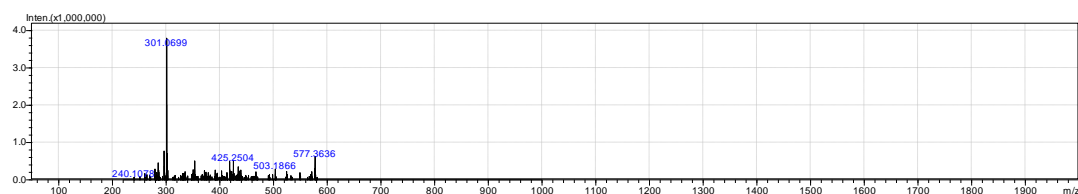

Event#: 4 MS(E-) Ret. Time : 21.483 Scan# : 2494

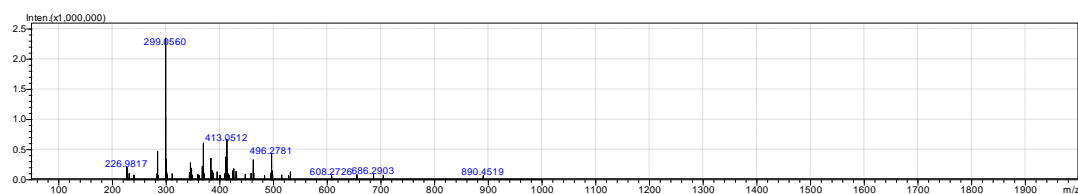

| Rank | Score | Formula (M)Ion    | Meas. m/z | Pred. m/z | Diff (mDa) | Diff (ppm) | Iso Score | DBE  |
|------|-------|-------------------|-----------|-----------|------------|------------|-----------|------|
| 1    | 90.94 | C16 H12 O6 [M-H]- | 299.0560  | 299.0556  | 0.4        | 1.34       | 91.72     | 11.0 |

Sm6

Event#: 1 MS(E+) Ret. Time : 22.458 Scan# : 2604

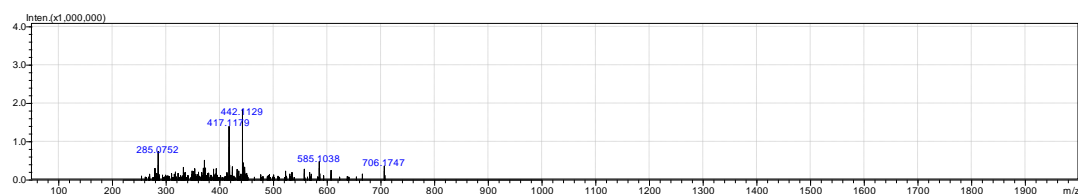

Event#: 4 MS(E-) Ret. Time : 22.458 Scan# : 2607

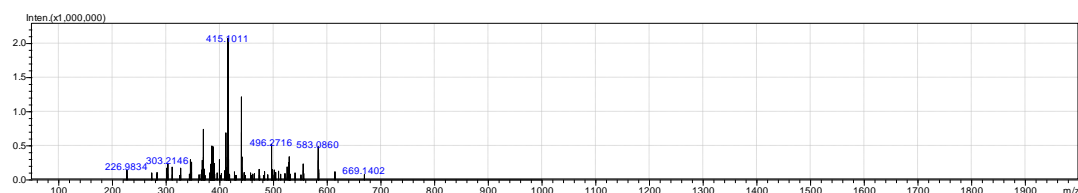

| Rank | Score | Formula (M)Ion    | Meas. m/z | Pred. m/z | Diff (mDa) | Diff (ppm) | Iso Score | DBE  |
|------|-------|-------------------|-----------|-----------|------------|------------|-----------|------|
| 1    | 71.25 | C21 H20 O9 [M-H]- | 415.1011  | 415.1029  | -1.8       | -4.34      | 77.75     | 12.0 |

Sm7

Event#: 1 MS(E+) Ret. Time : 22.847 Scan# : 2649



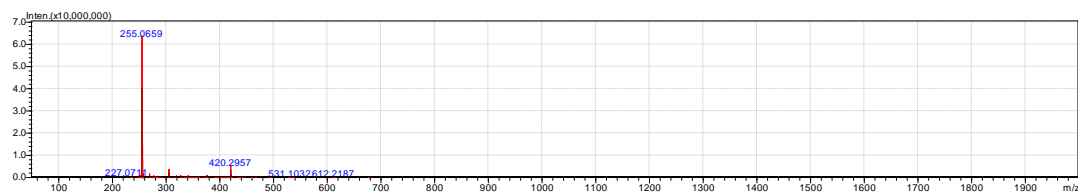

Event#: 4 MS(E-) Ret. Time : 22.847 Scan# : 2652

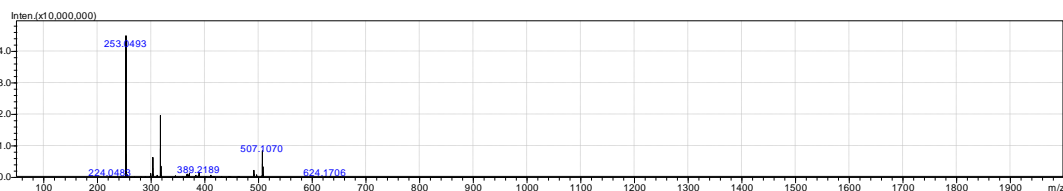

| Rank | Score | Formula (M)Ion                | Meas. m/z | Pred. m/z | Diff (mDa) | Diff (ppm) | Iso Score | DBE  |
|------|-------|-------------------------------|-----------|-----------|------------|------------|-----------|------|
| 1    | 89.33 | C15 H10 O4 [M+H] <sup>+</sup> | 255.0659  | 255.0657  | 0.2        | 0.78       | 89.33     | 11.0 |

Sm8

Event#: 1 MS(E+) Ret. Time : 23.227 Scan# : 2693

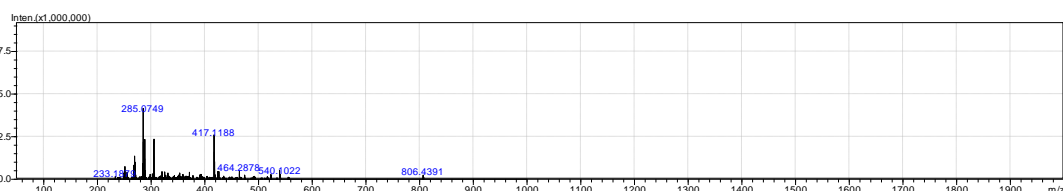

Event#: 4 MS(E-) Ret. Time : 23.227 Scan# : 2696

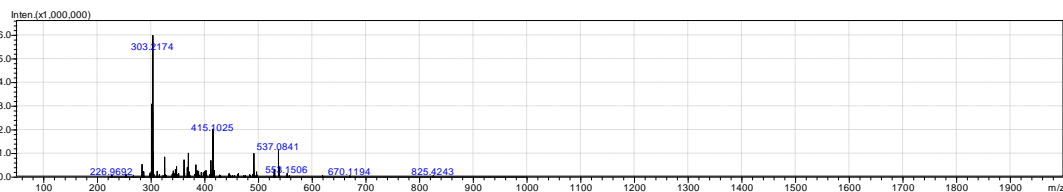

| Rank | Score | Formula (M)Ion                | Meas. m/z | Pred. m/z | Diff (mDa) | Diff (ppm) | Iso Score | DBE  |
|------|-------|-------------------------------|-----------|-----------|------------|------------|-----------|------|
| 1    | 65.43 | C21 H20 O9 [M-H] <sup>-</sup> | 415.1025  | 415.1029  | -0.4       | -0.96      | 65.43     | 12.0 |

Sm9

Event#: 1 MS(E+) Ret. Time : 23.425 Scan# : 2716

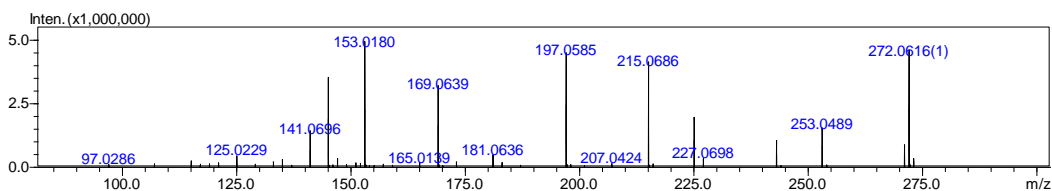

| Rank | Score | Formula (M)Ion                | Meas. m/z | Pred. m/z | Diff (mDa) | Diff (ppm) | Iso Score | DBE  |
|------|-------|-------------------------------|-----------|-----------|------------|------------|-----------|------|
| 1    | 67.08 | C15 H10 O5 [M+H] <sup>+</sup> | 271.0632  | 271.0645  | -1.7       | -3.32      | 72.13     | 12.0 |

Sm10

Event#: 1 MS(E+) Ret. Time : 24.080 Scan# : 2792

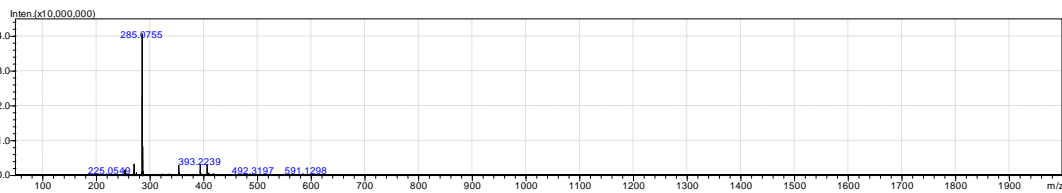

Event#: 4 MS(E-) Ret. Time : 24.080 Scan# : 2795

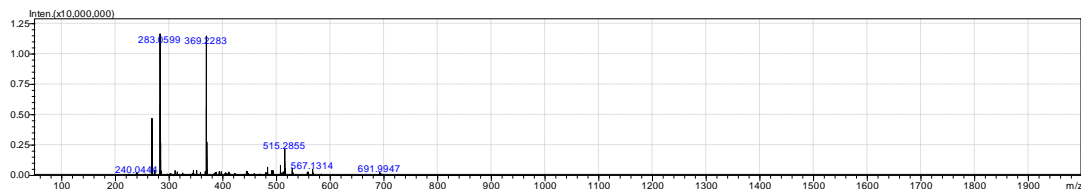

| Rank | Score | Formula (M)Ion                | Meas. m/z | Pred. m/z | Diff (mDa) | Diff (ppm) | Iso Score | DBE  |
|------|-------|-------------------------------|-----------|-----------|------------|------------|-----------|------|
| 1    | 87.05 | C16 H12 O5 [M+H] <sup>+</sup> | 285.0755  | 285.0763  | -0.8       | -2.81      | 91.18     | 11.0 |

Sm11

Event#: 1 MS(E+) Ret. Time : 25.132 Scan# : 2914

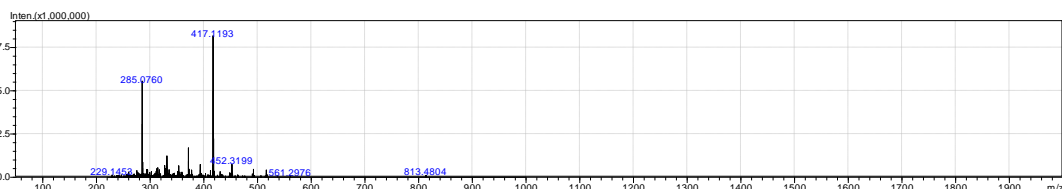

Event#: 4 MS(E-) Ret. Time : 25.132 Scan# : 2917

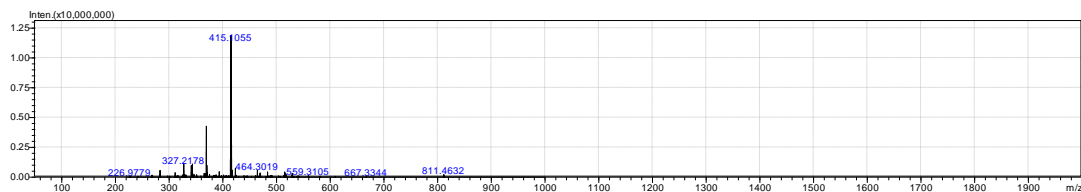

| Rank | Score | Formula (M)Ion                | Meas. m/z | Pred. m/z | Diff (mDa) | Diff (ppm) | Iso Score | DBE  |
|------|-------|-------------------------------|-----------|-----------|------------|------------|-----------|------|
| 1    | 89.02 | C21 H20 O9 [M+H] <sup>+</sup> | 417.1193  | 417.1186  | 0.7        | 1.68       | 90.56     | 12.0 |

Sm12

Event#: 1 MS(E+) Ret. Time : 27.053 Scan# : 3137

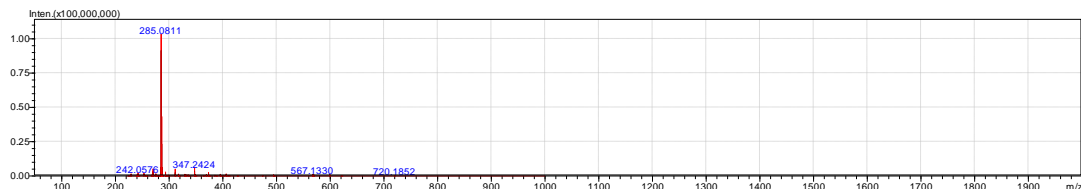

Event#: 4 MS(E-) Ret. Time : 27.053 Scan# : 3140

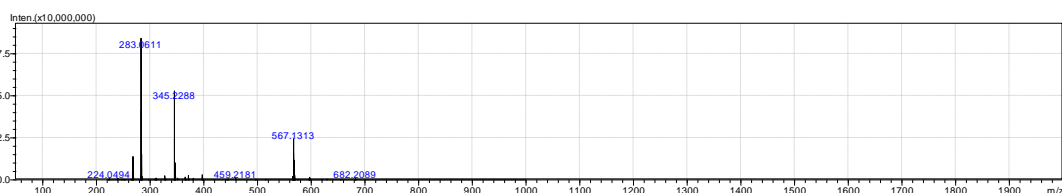

| Rank | Score | Formula (M)Ion | Meas. m/z | Pred. m/z | Diff (mDa) | Diff (ppm) | Iso Score | DBE |
|------|-------|----------------|-----------|-----------|------------|------------|-----------|-----|
|------|-------|----------------|-----------|-----------|------------|------------|-----------|-----|

1 69.93 C16 H12 O5 [M-H]- 283.0611 283.0606 0.5 1.77 71.31 11.0

Sm13

Event#: 1 MS(E+) Ret. Time : 27.518 Scan# : 3191

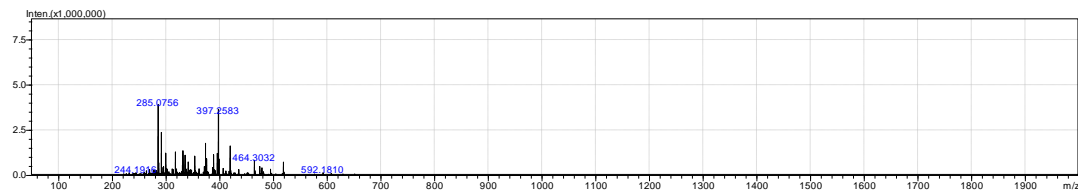

Event#: 4 MS(E-) Ret. Time : 27.518 Scan# : 3194

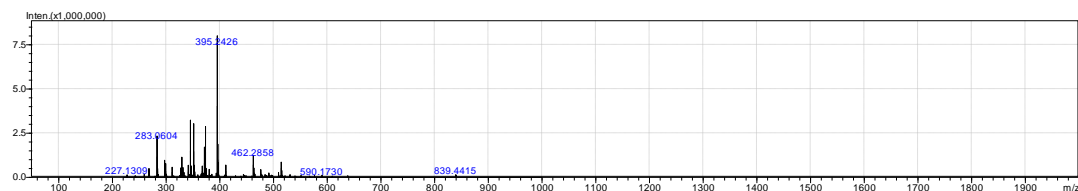

| Rank | Score | Formula (M)Ion    | Meas. m/z | Pred. m/z | Diff (mDa) | Diff (ppm) | Iso Score | DBE  |
|------|-------|-------------------|-----------|-----------|------------|------------|-----------|------|
| 1    | 89.33 | C16 H12 O5 [M+H]+ | 285.0756  | 285.0763  | -0.7       | -2.46      | 92.71     | 11.0 |

Sm14

Event#: 1 MS(E+) Ret. Time : 32.385 Scan# : 3756

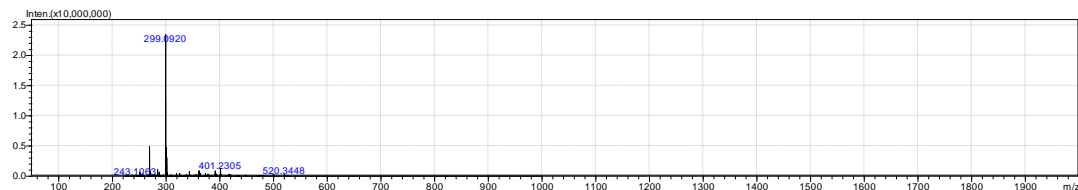

| Rank | Score | Formula (M)Ion    | Meas. m/z | Pred. m/z | Diff (mDa) | Diff (ppm) | Iso Score | DBE  |
|------|-------|-------------------|-----------|-----------|------------|------------|-----------|------|
| 1    | 45.63 | C17 H14 O5 [M+H]+ | 299.0920  | 299.0919  | 0.1        | 0.33       | 45.63     | 11.0 |

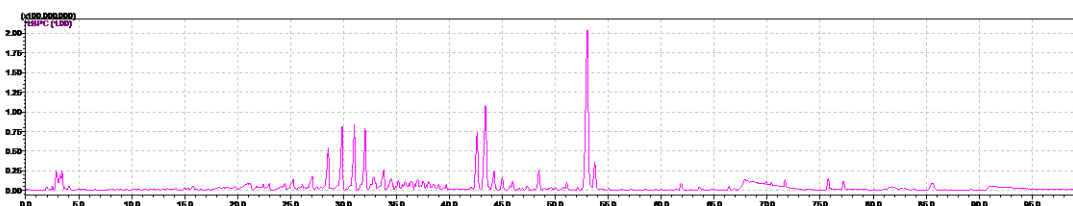

Figure S17. Onion in rat biological urine sample by LC/MS analysis PI BPC.

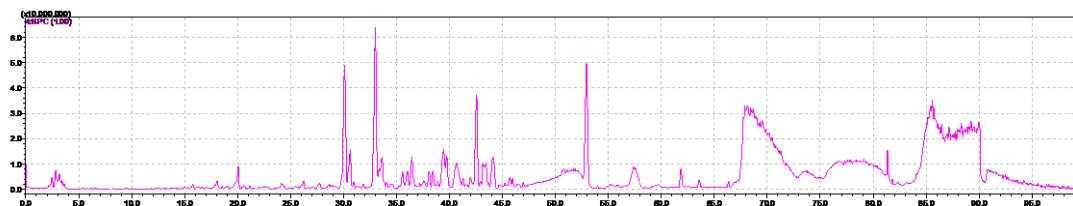

Figure S18. onion in rat biological urine sample by LC/MS analysis NI BPC.



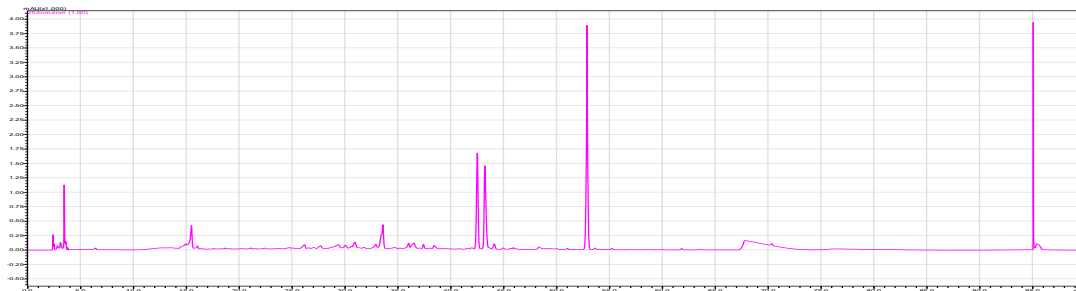

Figure S19. Onion in rat biological urine sample by LC/MS analysis UV(254nm).

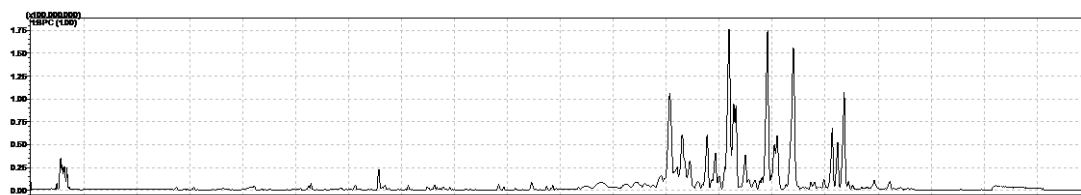

Figure S20. Rat biological blank urine sample by LC/MS analysis PI BPC.

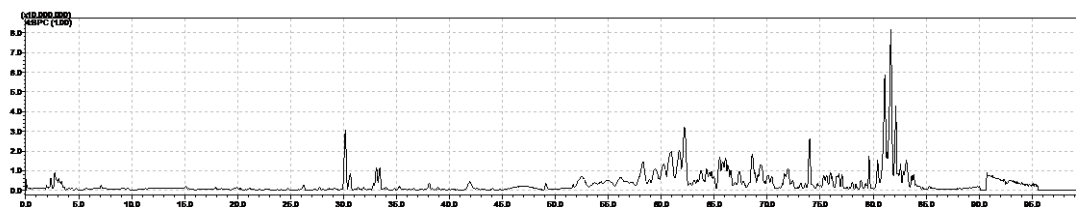

Figure S21. Rat biological blank urine sample by LC/MS analysis NI BPC.

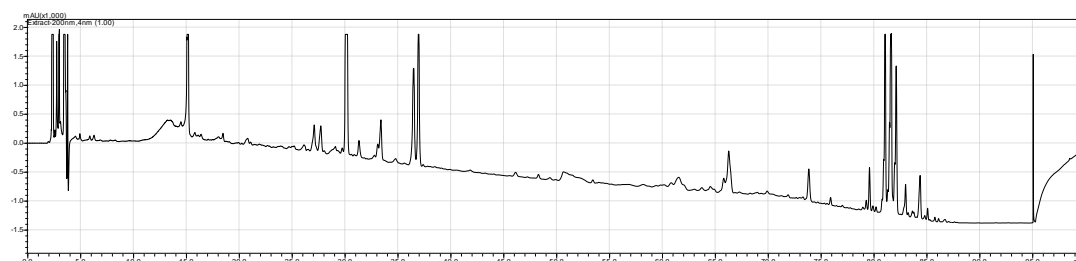

Figure S22. Rat biological blank urine sample by LC/MS analysis UV(254nm).

## Onion

Event#: 1 MS(E+) Ret. Time : 52.977 Scan# : 6144

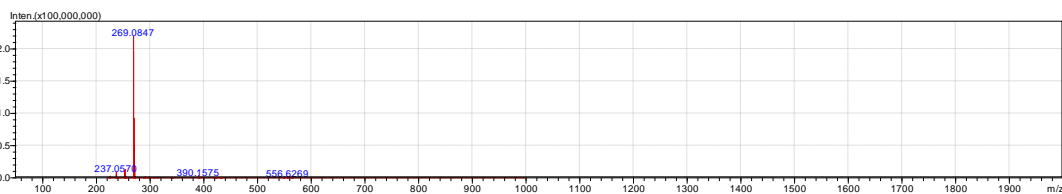

Event#: 4 MS(E-) Ret. Time : 52.977 Scan# : 6147

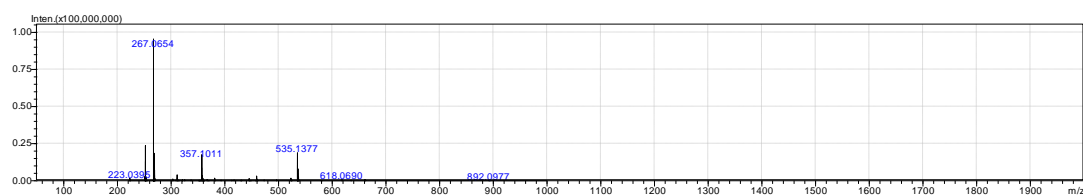

| Rank | Score | Formula (M) | Ion    | Meas. m/z | Pred. m/z | Diff (mDa) | Diff (ppm) | Iso Score | DBE  |
|------|-------|-------------|--------|-----------|-----------|------------|------------|-----------|------|
| 1    | 57.38 | C16 H12 O4  | [M-H]- | 267.0654  | 267.0657  | -0.3       | -1.12      | 57.55     | 11.0 |

#### M1(metabolite)

Event#: 1 MS(E+) Ret. Time : 33.707 Scan# : 3908

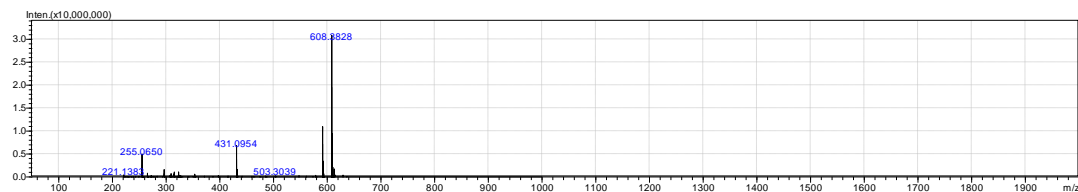

Event#: 4 MS(E-) Ret. Time : 33.707 Scan# : 3911

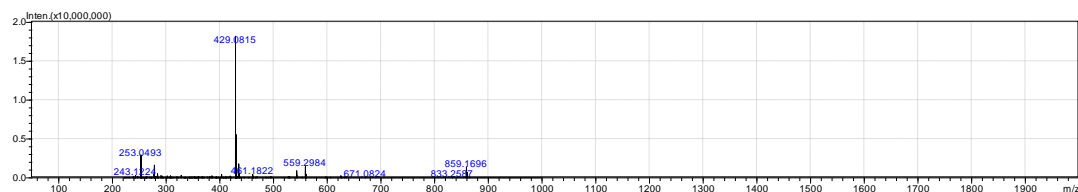

| Rank | Score | Formula (M) | Ion    | Meas. m/z | Pred. m/z | Diff (mDa) | Diff (ppm) | Iso Score | DBE  |
|------|-------|-------------|--------|-----------|-----------|------------|------------|-----------|------|
| 1    | 79.79 | C21 H18 O10 | [M-H]- | 429.0815  | 429.0822  | -0.7       | -1.63      | 81.06     | 13.0 |

#### M2

Event#: 4 MS(E-) Ret. Time : 34.397 Scan# : 3991

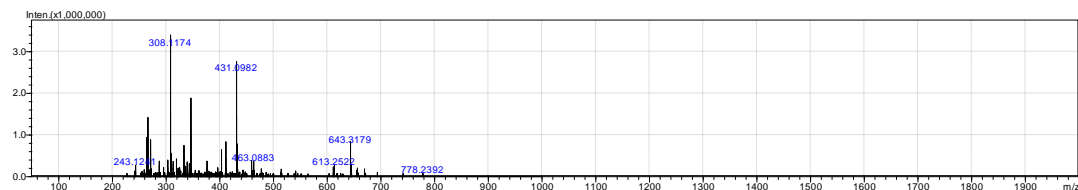

| Rank | Score | Formula (M) | Ion    | Meas. m/z | Pred. m/z | Diff (mDa) | Diff (ppm) | Iso Score | DBE  |
|------|-------|-------------|--------|-----------|-----------|------------|------------|-----------|------|
| 1    | 45.52 | C21 H20 O10 | [M-H]- | 431.0982  | 431.0978  | 0.4        | 0.93       | 45.52     | 12.0 |

#### M3

Event#: 4 MS(E-) Ret. Time : 35.872 Scan# : 4162

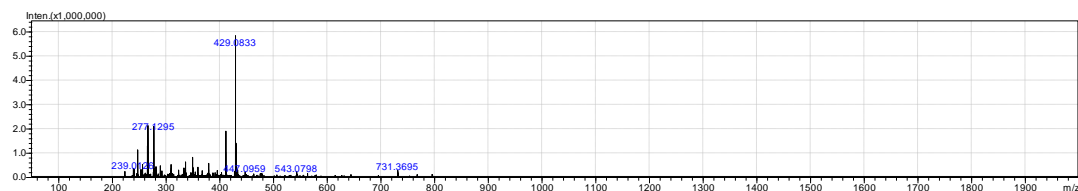

| Rank | Score | Formula (M) | Ion    | Meas. m/z | Pred. m/z | Diff (mDa) | Diff (ppm) | Iso Score | DBE  |
|------|-------|-------------|--------|-----------|-----------|------------|------------|-----------|------|
| 1    | 75.60 | C21 H18 O10 | [M-H]- | 429.0833  | 429.0822  | 1.1        | 2.56       | 78.67     | 13.0 |

#### M4

Event#: 4 MS(E-) Ret. Time : 36.372 Scan# : 4220

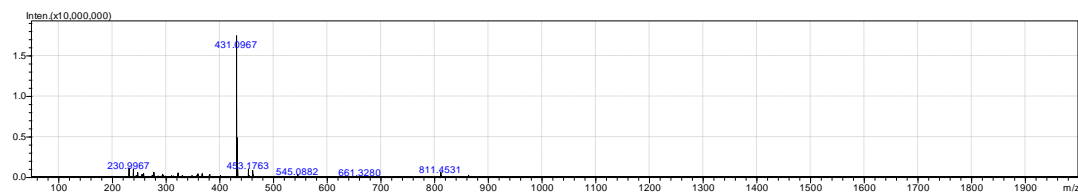

| Rank | Score | Formula (M)Ion | Meas. m/z | Pred. m/z | Diff (mDa) | Diff (ppm) | Iso Score | DBE        |
|------|-------|----------------|-----------|-----------|------------|------------|-----------|------------|
| 1    | 74.11 | C21 H20 O10    | [M-H]-    | 431.0967  | 431.0978   | -1.1       | -2.55     | 77.10 12.0 |

M5

Event#: 4 MS(E-) Ret. Time : 38.525 Scan# : 4470

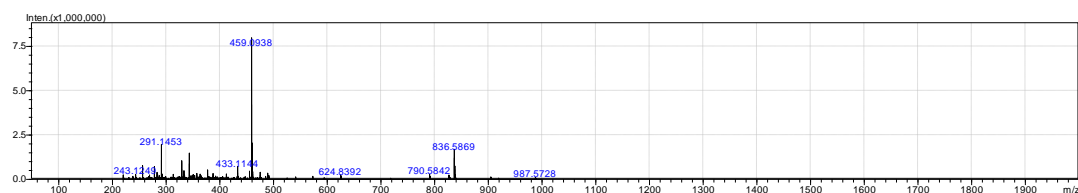

| Rank | Score | Formula (M)Ion | Meas. m/z | Pred. m/z | Diff (mDa) | Diff (ppm) | Iso Score | DBE        |
|------|-------|----------------|-----------|-----------|------------|------------|-----------|------------|
| 1    | 90.87 | C22 H20 O11    | [M-H]-    | 459.0938  | 459.0927   | 1.1        | 2.40      | 94.17 13.0 |

M6

Event#: 4 MS(E-) Ret. Time : 39.447 Scan# : 4577

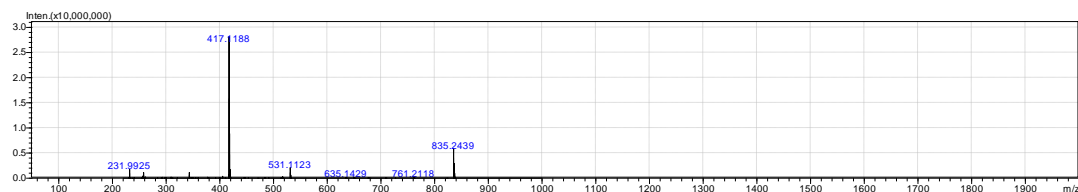

| Rank | Score | Formula (M)Ion    | Meas. m/z | Pred. m/z | Diff (mDa) | Diff (ppm) | Iso Score | DBE  |
|------|-------|-------------------|-----------|-----------|------------|------------|-----------|------|
| 1    | 85.77 | C21 H22 O9 [M-H]- | 417.1188  | 417.1186  | 0.2        | 0.48       | 85.77     | 11.0 |

M7

Event#: 4 MS(E-) Ret. Time : 39.705 Scan# : 4607

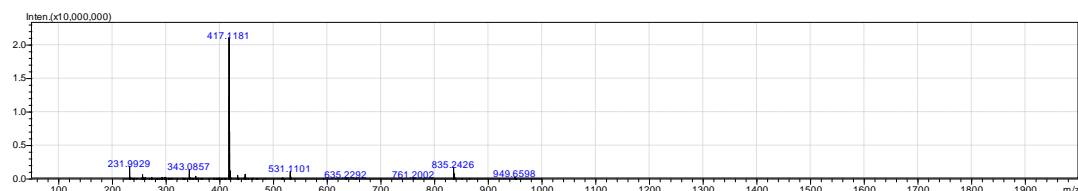

| Rank | Score | Formula (M)Ion    | Meas. m/z | Pred. m/z | Diff (mDa) | Diff (ppm) | Iso Score | DBE  |
|------|-------|-------------------|-----------|-----------|------------|------------|-----------|------|
| 1    | 84.43 | C21 H22 O9 [M-H]- | 417.1181  | 417.1186  | -0.5       | -1.20      | 84.86     | 11.0 |

M8

Event#: 1 MS(E+) Ret. Time : 42.007 Scan# : 4871



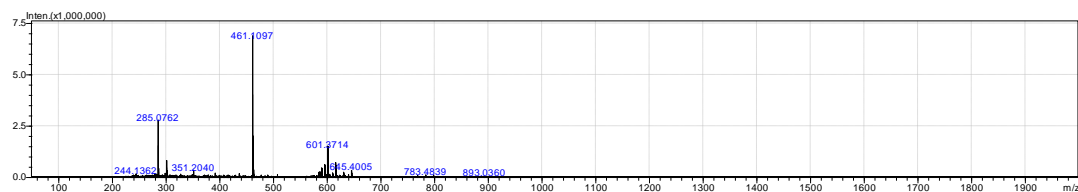

Event#: 4 MS(E-) Ret. Time : 42.007 Scan# : 4874

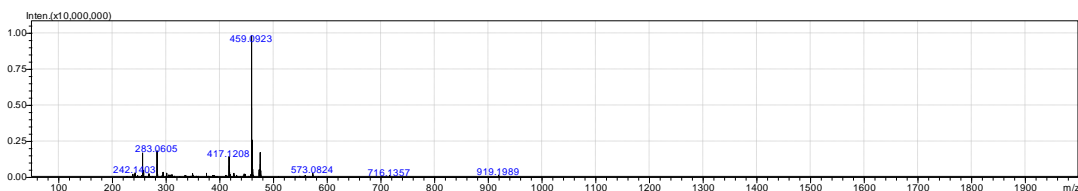

| Rank | Score | Formula (M) | Ion                | Meas. m/z | Pred. m/z | Diff (mDa) | Diff (ppm) | Iso Score | DBE  |
|------|-------|-------------|--------------------|-----------|-----------|------------|------------|-----------|------|
| 1    | 81.32 | C22 H20 O11 | [M+H] <sup>+</sup> | 461.1097  | 461.1084  | 1.3        | 2.82       | 85.20     | 13.0 |

M9

Event#: 1 MS(E+) Ret. Time : 42.627 Scan# : 4943

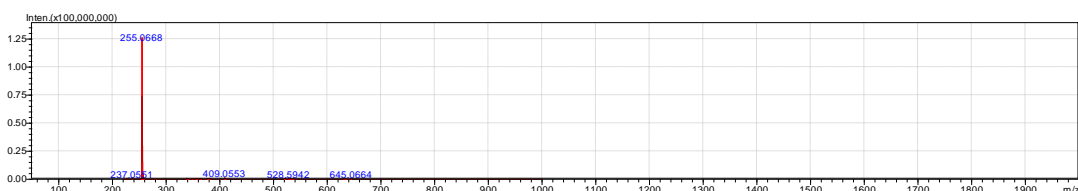

Event#: 4 MS(E-) Ret. Time : 42.627 Scan# : 4946

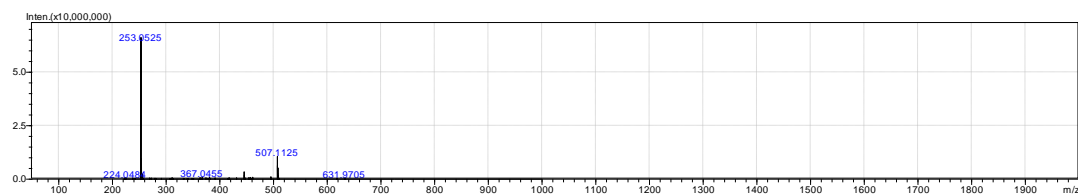

| Rank | Score | Formula (M) | Ion                | Meas. m/z | Pred. m/z | Diff (mDa) | Diff (ppm) | Iso Score | DBE  |
|------|-------|-------------|--------------------|-----------|-----------|------------|------------|-----------|------|
| 1    | 69.44 | C15 H10 O4  | [M+H] <sup>+</sup> | 255.0668  | 255.0657  | 1.1        | 4.31       | 75.71     | 11.0 |

M10

Event#: 1 MS(E+) Ret. Time : 43.143 Scan# : 5003

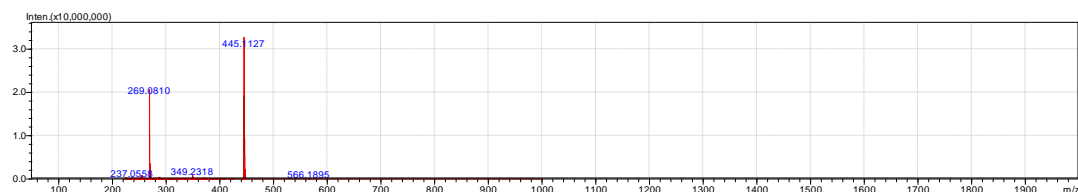

Event#: 4 MS(E-) Ret. Time : 43.143 Scan# : 5005

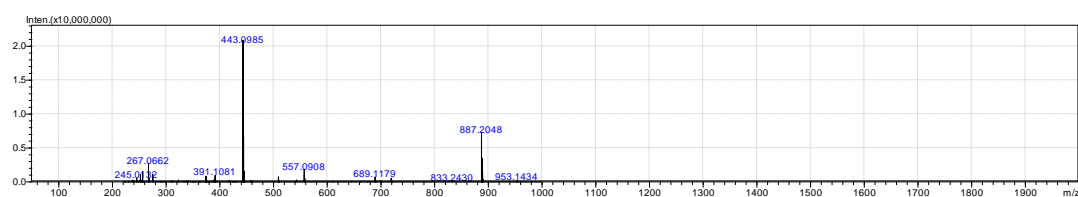

| Rank | Score | Formula (M) | Ion | Meas. m/z | Pred. m/z | Diff (mDa) | Diff (ppm) | Iso Score | DBE |
|------|-------|-------------|-----|-----------|-----------|------------|------------|-----------|-----|
|------|-------|-------------|-----|-----------|-----------|------------|------------|-----------|-----|

1 75.65 C22 H20 O10 [M+H]<sup>+</sup> 445.1127 445.1135 -0.8 -1.80 77.19 13.0

M11

Event#: 1 MS(E<sup>+</sup>) Ret. Time : 43.445 Scan# : 5038

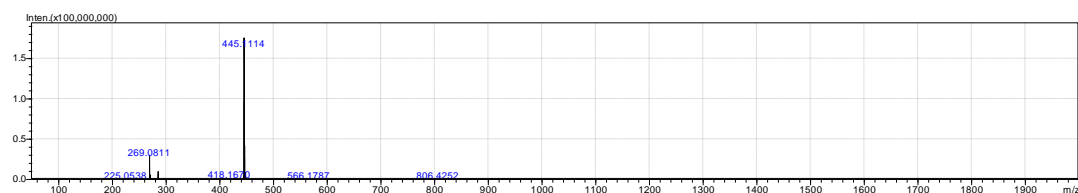

Event#: 4 MS(E<sup>-</sup>) Ret. Time : 43.445 Scan# : 5041

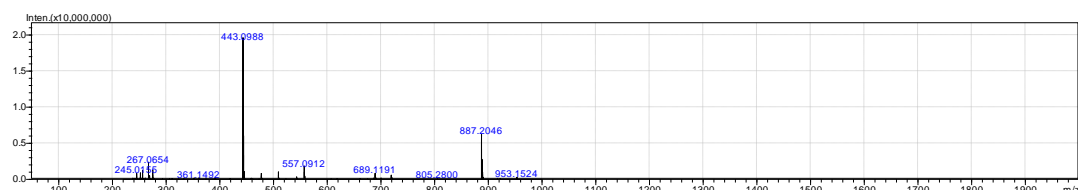

| Rank | Score | Formula (M) | Ion                | Meas. m/z | Pred. m/z | Diff (mDa) | Diff (ppm) | Iso Score | DBE  |
|------|-------|-------------|--------------------|-----------|-----------|------------|------------|-----------|------|
| 1    | 69.85 | C22 H20 O10 | [M+H] <sup>+</sup> | 445.1114  | 445.1135  | -2.1       | -4.72      | 77.02     | 13.0 |

M12

Event#: 1 MS(E<sup>+</sup>) Ret. Time : 43.703 Scan# : 5068

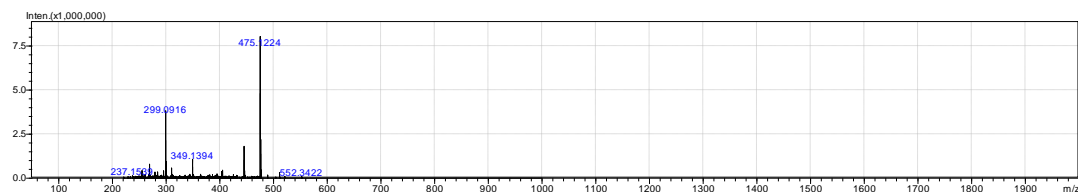

Event#: 4 MS(E<sup>-</sup>) Ret. Time : 43.703 Scan# : 5071

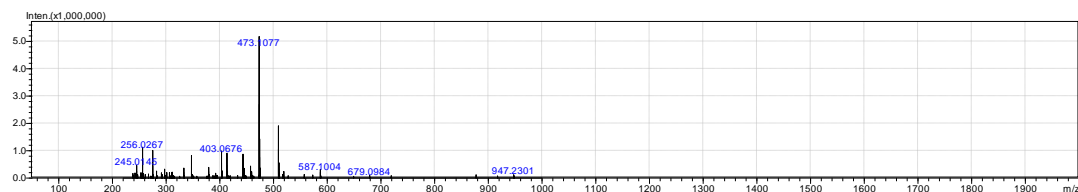

| Rank | Score | Formula (M) | Ion                | Meas. m/z | Pred. m/z | Diff (mDa) | Diff (ppm) | Iso Score | DBE  |
|------|-------|-------------|--------------------|-----------|-----------|------------|------------|-----------|------|
| 1    | 77.12 | C23 H22 O11 | [M+H] <sup>+</sup> | 475.1224  | 475.1240  | -1.6       | -3.37      | 81.98     | 13.0 |

M13

Event#: 1 MS(E<sup>+</sup>) Ret. Time : 44.168 Scan# : 5122

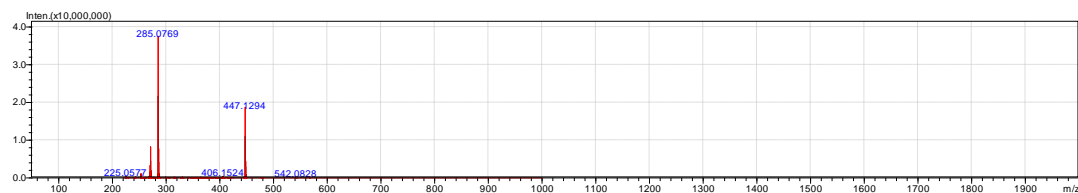

Event#: 4 MS(E<sup>-</sup>) Ret. Time : 44.168 Scan# : 5125

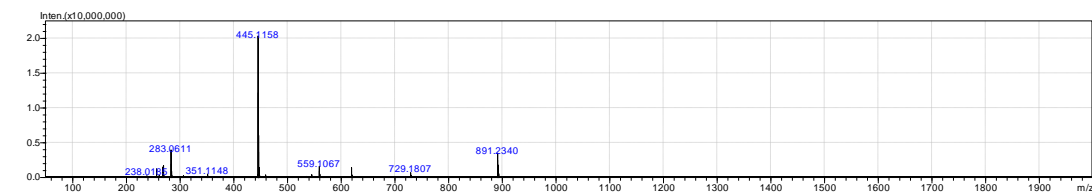

| Rank | Score | Formula (M) | Ion                | Meas. m/z | Pred. m/z | Diff (mDa) | Diff (ppm) | Iso Score | DBE  |
|------|-------|-------------|--------------------|-----------|-----------|------------|------------|-----------|------|
| 1    | 99.01 | C22 H22 O10 | [M+H] <sup>+</sup> | 447.1294  | 447.1291  | 0.3        | 0.67       | 99.01     | 12.0 |

## M14

Event#: 1 MS(E<sup>+</sup>) Ret. Time : 44.988 Scan# : 5217

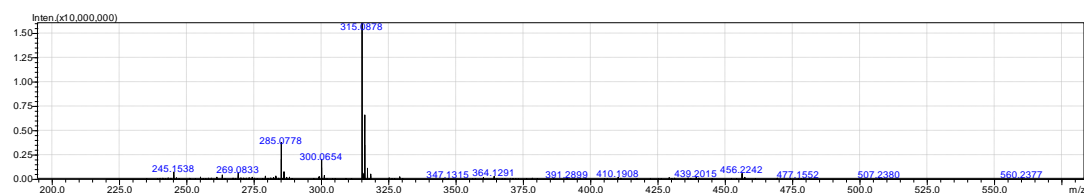

Event#: 4 MS(E<sup>-</sup>) Ret. Time : 44.988 Scan# : 5220

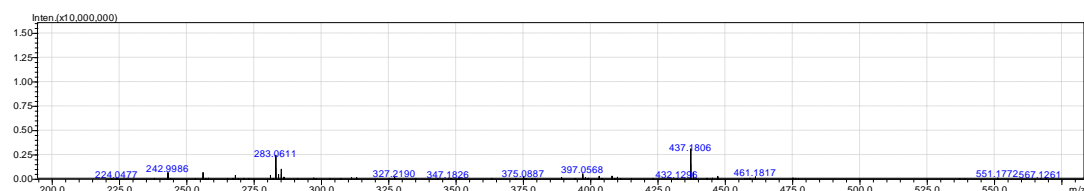

| Rank | Score | Formula (M) | Ion                | Meas. m/z | Pred. m/z | Diff (mDa) | Diff (ppm) | Iso Score | DBE  |
|------|-------|-------------|--------------------|-----------|-----------|------------|------------|-----------|------|
| 1    | 53.87 | C16 H12 O5  | [M+H] <sup>+</sup> | 285.0778  | 285.0763  | 1.5        | 5.26       | 61.63     | 11.0 |

## M15

Event#: 1 MS(E<sup>+</sup>) Ret. Time : 45.652 Scan# : 5294

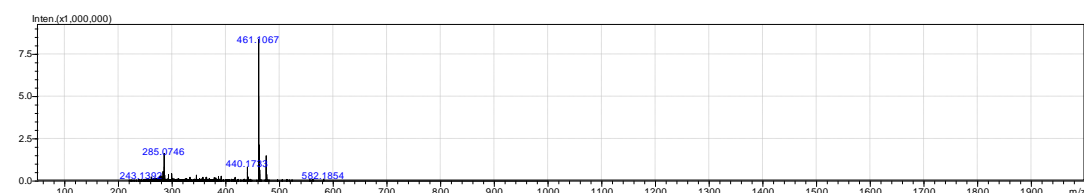

Event#: 4 MS(E<sup>-</sup>) Ret. Time : 45.652 Scan# : 5297

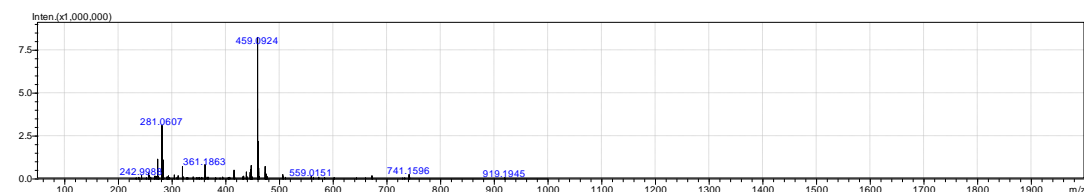

| Rank | Score | Formula (M) | Ion                | Meas. m/z | Pred. m/z | Diff (mDa) | Diff (ppm) | Iso Score | DBE  |
|------|-------|-------------|--------------------|-----------|-----------|------------|------------|-----------|------|
| 1    | 83.77 | C22 H20 O11 | [M-H] <sup>-</sup> | 459.0924  | 459.0927  | -0.3       | -0.65      | 83.77     | 13.0 |

## M16

Event#: 1 MS(E<sup>+</sup>) Ret. Time : 48.427 Scan# : 5616



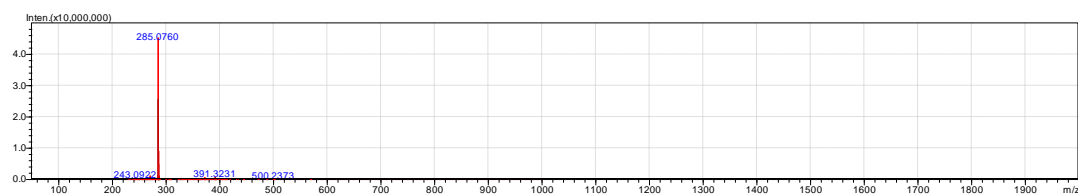

Event#: 4 MS(E-) Ret. Time : 48.427 Scan# : 5619

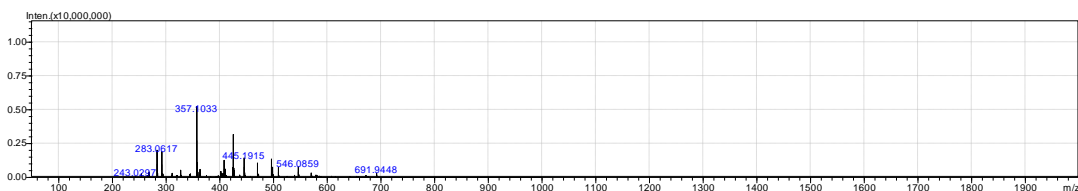

| Rank | Score | Formula (M)Ion                | Meas. m/z | Pred. m/z | Diff (mDa) | Diff (ppm) | Iso Score | DBE  |
|------|-------|-------------------------------|-----------|-----------|------------|------------|-----------|------|
| 1    | 85.95 | C16 H12 O5 [M+H] <sup>+</sup> | 285.0760  | 285.0763  | -0.3       | -1.05      | 86.06     | 11.0 |

M17

Event#: 1 MS(E+) Ret. Time : 48.935 Scan# : 5675

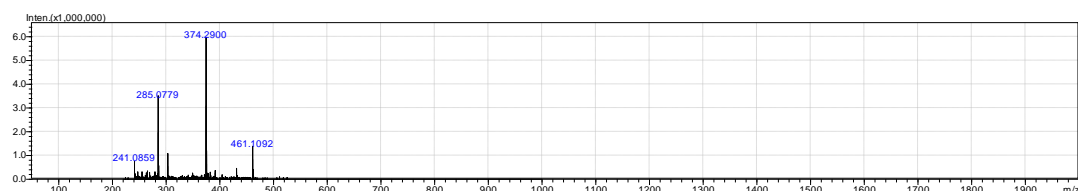

| Rank | Score | Formula (M)Ion                | Meas. m/z | Pred. m/z | Diff (mDa) | Diff (ppm) | Iso Score | DBE  |
|------|-------|-------------------------------|-----------|-----------|------------|------------|-----------|------|
| 1    | 69.13 | C16 H12 O5 [M+H] <sup>+</sup> | 285.0779  | 285.0763  | 1.6        | 5.61       | 82.39     | 11.0 |

M18

Event#: 1 MS(E+) Ret. Time : 53.890 Scan# : 6250

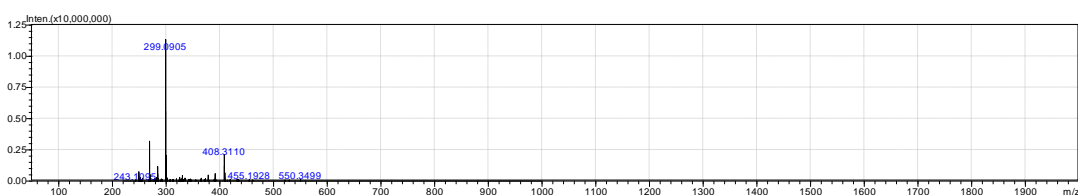

| Rank | Score | Formula (M)Ion                | Meas. m/z | Pred. m/z | Diff (mDa) | Diff (ppm) | Iso Score | DBE  |
|------|-------|-------------------------------|-----------|-----------|------------|------------|-----------|------|
| 1    | 64.81 | C17 H14 O5 [M+H] <sup>+</sup> | 299.0905  | 299.0919  | -1.4       | -4.68      | 71.38     | 11.0 |

M19

Event#: 1 MS(E+) Ret. Time : 67.932 Scan# : 7877

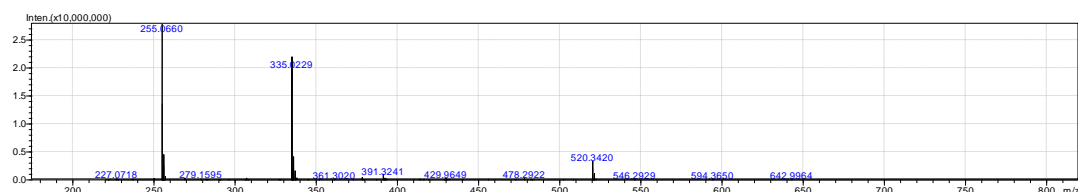

Event#: 4 MS(E-) Ret. Time : 67.932 Scan# : 7879

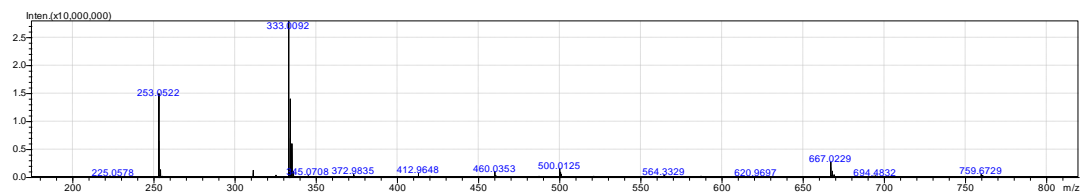

| Rank | Score | Formula (M)                                      | Ion                | Meas. m/z | Pred. m/z | Diff (mDa) | Diff (ppm) | Iso Score | DBE  |
|------|-------|--------------------------------------------------|--------------------|-----------|-----------|------------|------------|-----------|------|
| 1    | 83.32 | C <sub>15</sub> H <sub>10</sub> O <sub>7</sub> S | [M+H] <sup>+</sup> | 335.0229  | 335.0225  | 0.4        | 1.19       | 83.72     | 11.0 |

M20

Event#: 1 MS(E<sup>+</sup>) Ret. Time : 76.412 Scan# : 8861

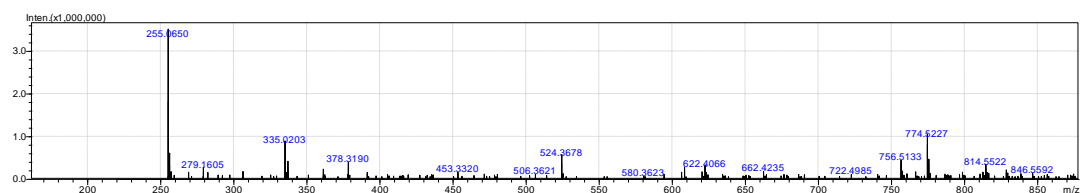

Event#: 4 MS(E<sup>-</sup>) Ret. Time : 76.412 Scan# : 8864

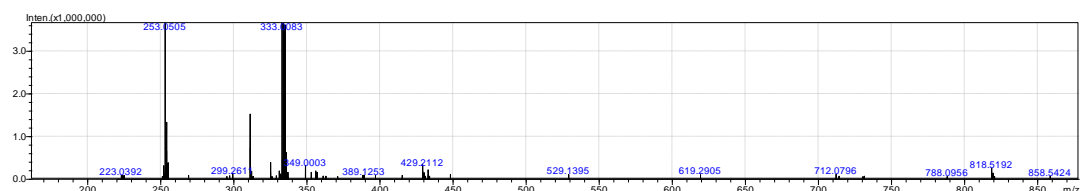

| Rank | Score | Formula (M)                                      | Ion                | Meas. m/z | Pred. m/z | Diff (mDa) | Diff (ppm) | Iso Score | DBE  |
|------|-------|--------------------------------------------------|--------------------|-----------|-----------|------------|------------|-----------|------|
| 1    | 45.22 | C <sub>15</sub> H <sub>10</sub> O <sub>7</sub> S | [M-H] <sup>-</sup> | 333.0083  | 333.0069  | 1.4        | 4.20       | 49.15     | 11.0 |

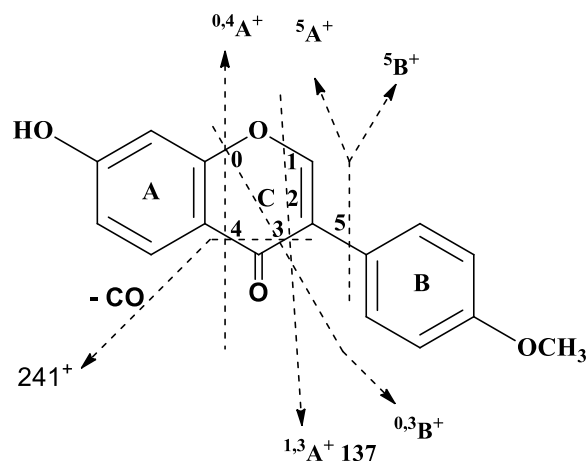

**Figure S23.** Nomenclature adopted for cross-ring cleavages of formononetin.

**Table S1.** Proposed metabolites of formononetin in hepatic S9 incubated sample by LC/MS analysis.

| metabolites       | tr (min) | [M+H] <sup>+</sup><br>(m/z) | [M-H] <sup>-</sup><br>(m/z) | Main fragment<br>Ion MS <sup>2</sup> MS <sup>3</sup> |
|-------------------|----------|-----------------------------|-----------------------------|------------------------------------------------------|
| Sm0(formononetin) | 31.205   | 269.0852                    | 267.0669                    | 269,237,213,163,118,107                              |
| Sm1               | 18.568   | 447.1289                    | 445.1134                    | 447,285(162),229,152                                 |
| Sm2               | 19.663   | 271.0597                    | 269.0452                    | 271,253,225,215,197,169,153,141                      |
| Sm3               | 20.413   |                             | 445.1115                    |                                                      |
| Sm4               | 20.897   | 431.1337                    |                             | 431,269(162),237,213,181,152                         |

|      |        |          |          |                             |
|------|--------|----------|----------|-----------------------------|
| Sm5  | 21.483 | 301.0699 | 299.0560 | 301,286,269,241,229,153     |
| Sm6  | 22.458 | 417.1179 | 415.1011 | 417,285(-132),268,152,124   |
| Sm7  | 22.847 | 255.0659 | 253.0493 | 255,227,199,152,137,109     |
| Sm8  | 23.227 | 417.1188 | 415.1025 | 447,285(-162),253,152,123   |
| Sm9  | 23.425 | 271.0606 |          | 271,253,225,215,197,169,153 |
| Sm10 | 24.080 | 285.0755 | 283.0599 | 285,253,225,197,141         |
| Sm11 | 25.132 | 417.1193 | 415.1055 | 417,285(-132),253,152,123   |
| Sm12 | 27.053 | 285.0811 | 283.0611 | 285,211,183,152             |
| Sm13 | 27.518 | 285.0756 | 283.0604 | 285,270,229,211,197,183,152 |
| Sm14 | 32.385 |          | 299.385  | 299,270,254,237,213,181     |

**Table S2.** Proposed metabolites of ononin in rat biological sample by LC/MS analysis.

| metabolites | t <sub>R</sub> (min) | [M+H] <sup>+</sup><br>(m/z) | [M-H] <sup>-</sup><br>(m/z) | Main fragment<br>Ion MS <sup>2</sup> MS <sup>3</sup> |
|-------------|----------------------|-----------------------------|-----------------------------|------------------------------------------------------|
| M1          | 33.707               | 431.0954                    | 429.0815                    | 429,253(-176),224,208,175,135                        |
| M2          | 34.397               |                             | 431.0982                    | 431,255(-176),175,149                                |
| M3          | 35.872               |                             | 429.0833                    | 429,253(-176),224,175                                |
| M4          | 36.372               |                             | 431.0967                    |                                                      |
| M5          | 38.525               |                             | 459.0938                    | 459,283(-176),268                                    |
| M6          | 39.447               |                             | 417.1188                    |                                                      |
| M7          | 39.705               |                             | 417.1181                    |                                                      |
| M8          | 42.007               | 461.1097                    | 459.0923                    | 461,285(-176),270,152,123                            |
| M9          | 42.627               | 255.0668                    | 253.0525                    | 255,199,152,137                                      |
| M10         | 43.143               | 445.1127                    | 443.0983                    | 445,269(-176),237,118                                |
| M11         | 43.445               | 445.1114                    | 443.0988                    | 443,267(-176),252,175                                |
| M12         | 43.703               | 475.1224                    | 473.1077                    |                                                      |
| M13         | 44.168               | 447.1294                    | 445.1158                    | 445,269,254,175,135                                  |
| M14         | 44.988               | 285.0778                    | 283.0611                    | 283,268,224,131                                      |
| M15         | 45.652               | 461.1067                    | 459.0924                    | 461,285(-176)                                        |
| M16         | 48.427               | 285.0760                    | 283.0617                    | 283,268,224                                          |
| M17         | 48.935               | 285.0779                    |                             | 285,241                                              |
| M18         | 76.412               | 335.0203                    | 333.0083                    | 333,253(-80),224,135                                 |
| M19         | 53.890               |                             | 299.0905                    | 299,284,243,166,137                                  |
| M20         | 67.932               | 335.0229                    | 333.0092                    | 333,253(-80),225,211,135                             |
| M21         | 52.977               | 269.0847                    | 267.0654                    | 269,237,181,152,118                                  |
